# Supplementary material
Source: PubMed Central journal article supplement (PMC8025739)
Supplement: NIHMS1027177-supplement-Supplemental.pdf [file NIHMS1027177-supplement-Supplemental.pdf]

# Supporting Information

## *Tumor-targeted delivery of 6-Diazo-5-oxo-L-norleucine (DON) using substituted acetylated lysine prodrugs*

*Lukáš Tenora<sup>7#</sup>, Jesse Alt<sup>1#</sup>, Ranjeet P. Dash<sup>1,2</sup>, Alexandra J. Gadiano<sup>1</sup>, Kateřina Novotná<sup>7</sup>, Vijayabhaskar Veeravalli<sup>1,2</sup>, Jenny Lam<sup>1</sup>, Quinn R. Kirkpatrick<sup>1</sup>, Kathryn M. Lemberg<sup>6</sup>, Pavel Majer<sup>7\*</sup>, Rana Rais<sup>1,2\*</sup>, Barbara S. Slusher<sup>1,2,3,4,5,6\*</sup>*

<sup>1</sup>Johns Hopkins Drug Discovery, Departments of <sup>2</sup>Neurology, <sup>3</sup>Psychiatry and Behavioral Sciences, <sup>4</sup>Neuroscience, <sup>5</sup>Medicine, <sup>6</sup>Oncology, Johns Hopkins School of Medicine, Baltimore, Maryland 21205, U.S.A.

<sup>7</sup>Institute of Organic Chemistry and Biochemistry, Academy of Sciences of the Czech Republic v.v.i., Prague, 166 10, Czech Republic

## Table of Contents

|                                                                                 |         |
|---------------------------------------------------------------------------------|---------|
| 1. Conditions for $^1\text{H}$ and $^{13}\text{C}$ NMR and HPLC analysis        | S3      |
| 2. $^1\text{H}$ and $^{13}\text{C}$ NMR spectra                                 | S4-S16  |
| 3. HPLC of <b>2</b> to <b>13</b>                                                | S17-S22 |
| 4. Mass transitions for LC-MS/MS analysis of <b>2</b> to <b>13</b>              | S23     |
| 5. Structure of internal standard losartan and L-glutamic acid-2,3,3,4,4- $d_5$ | S24     |
| 6. Stability of <b>6</b> in human liver fractions                               | S25     |
| 7. Tumor cell-to-plasma partitioning in three different cell lines              | S26     |
| 8. HRMS chromatogram and spectra of <b>6</b> and its de-esterified product      | S27     |

Conditions for NMR spectra:

The  $^1\text{H}$  NMR spectra were measured at 400.1 MHz and  $^{13}\text{C}$  NMR spectra at 100.8 MHz.

Conditions for HPLC analysis:

We utilized an HPLC (Jasco Inc.) equipped with a Reprosil 100 C18, 5  $\mu\text{m}$ , 250 mm  $\times$  4 mm column. The analysis was performed using a gradient of 2%  $\text{CH}_3\text{CN}/98\%$   $\text{H}_2\text{O}$  with 0.1% formic acid  $\rightarrow$  100%  $\text{CH}_3\text{CN}$ , with UV detection,  $\lambda = 210$  nm.

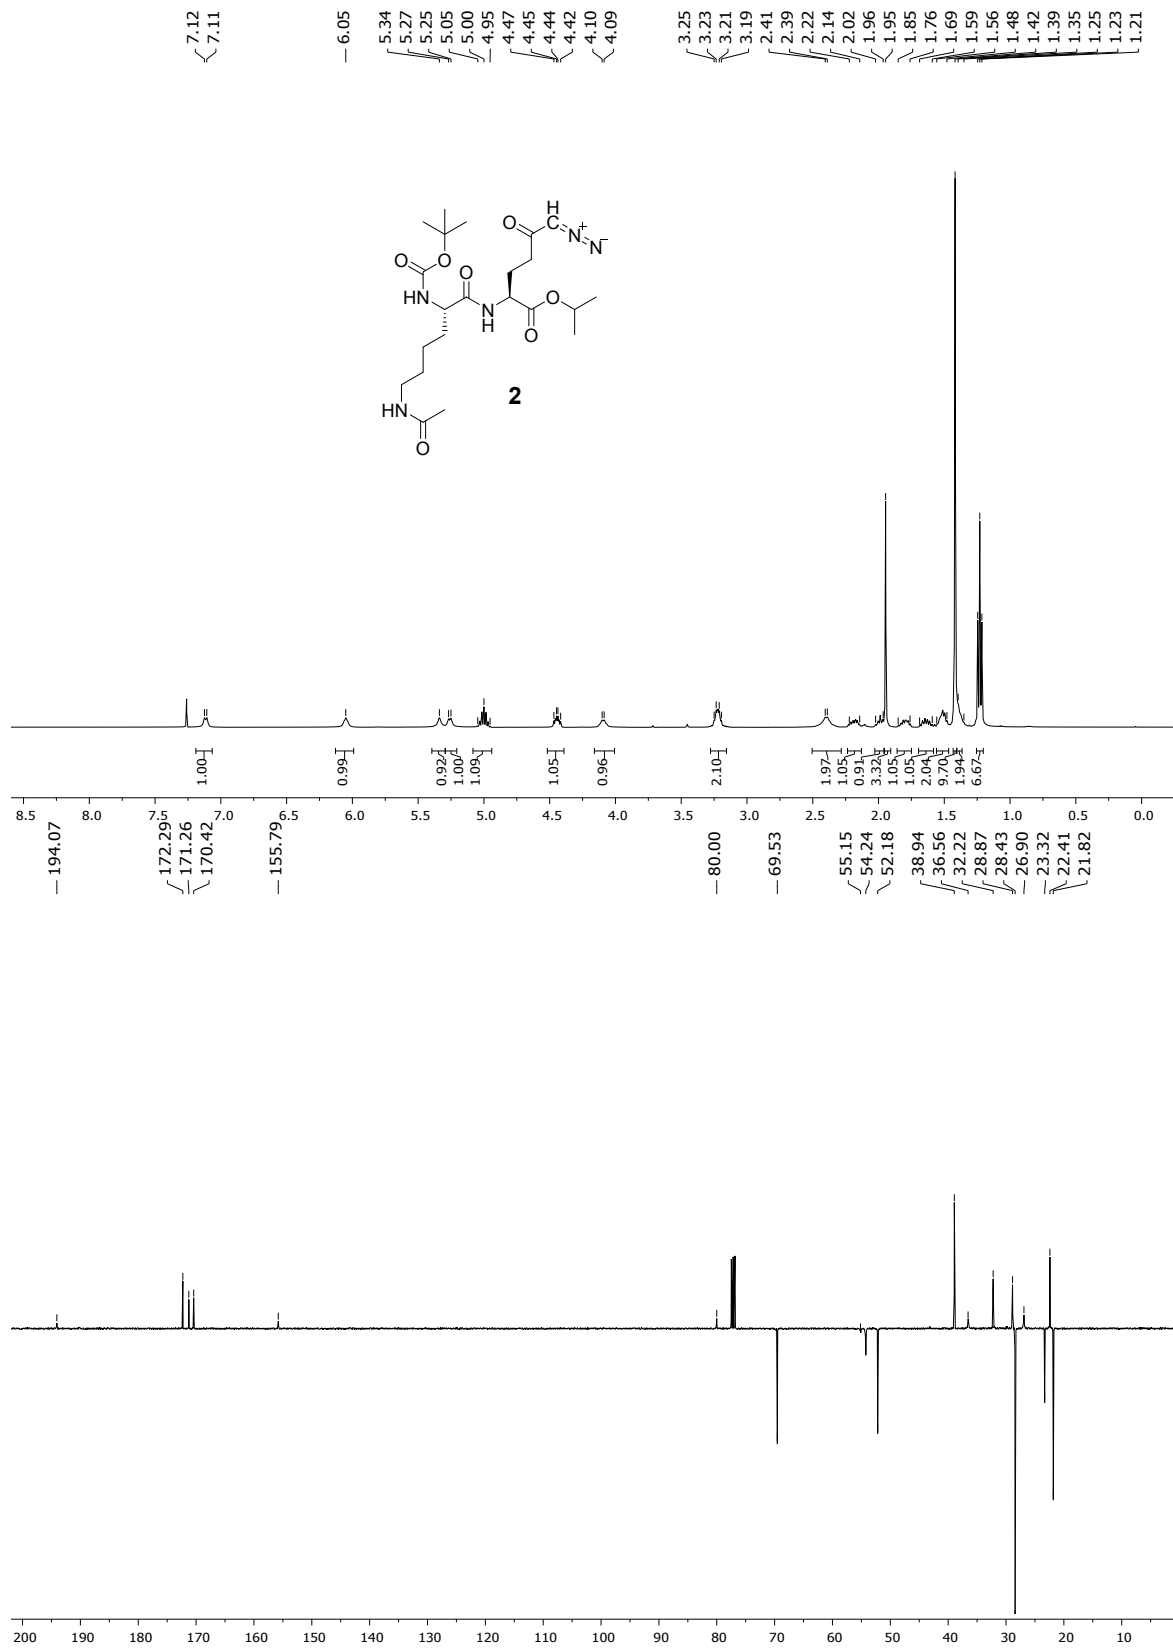

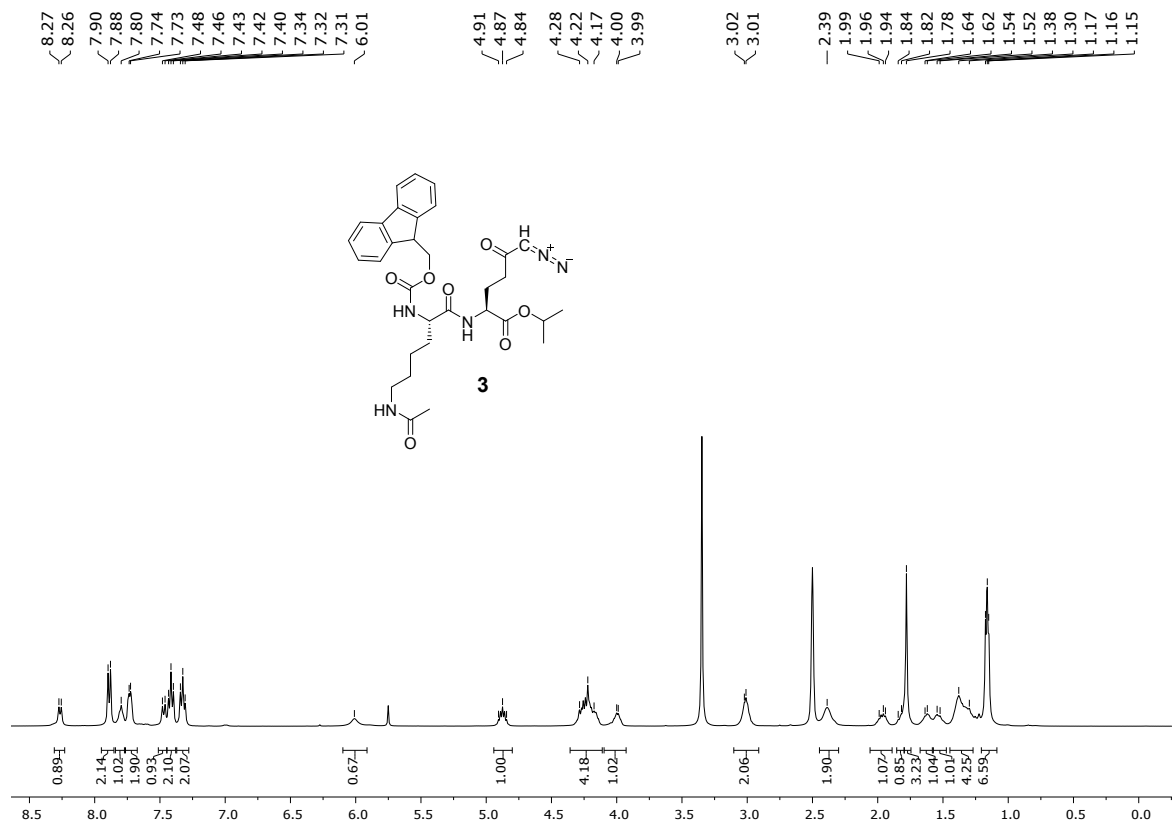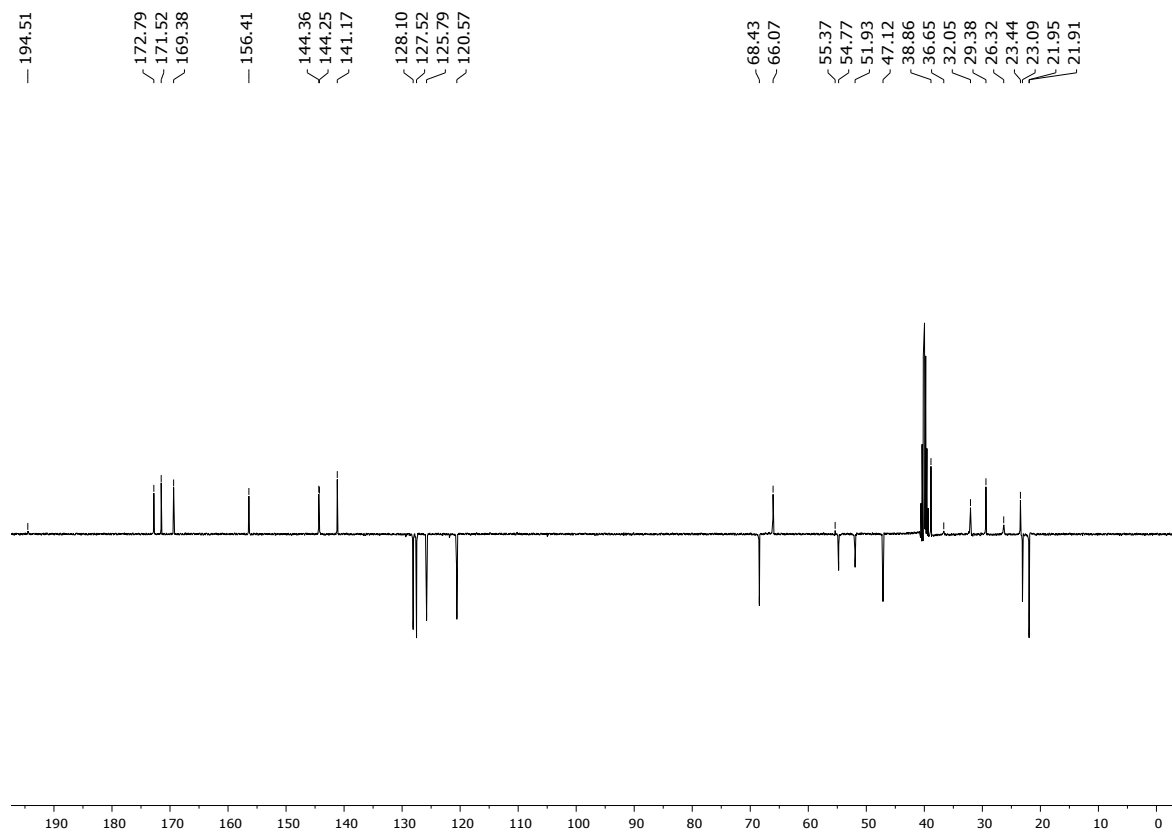

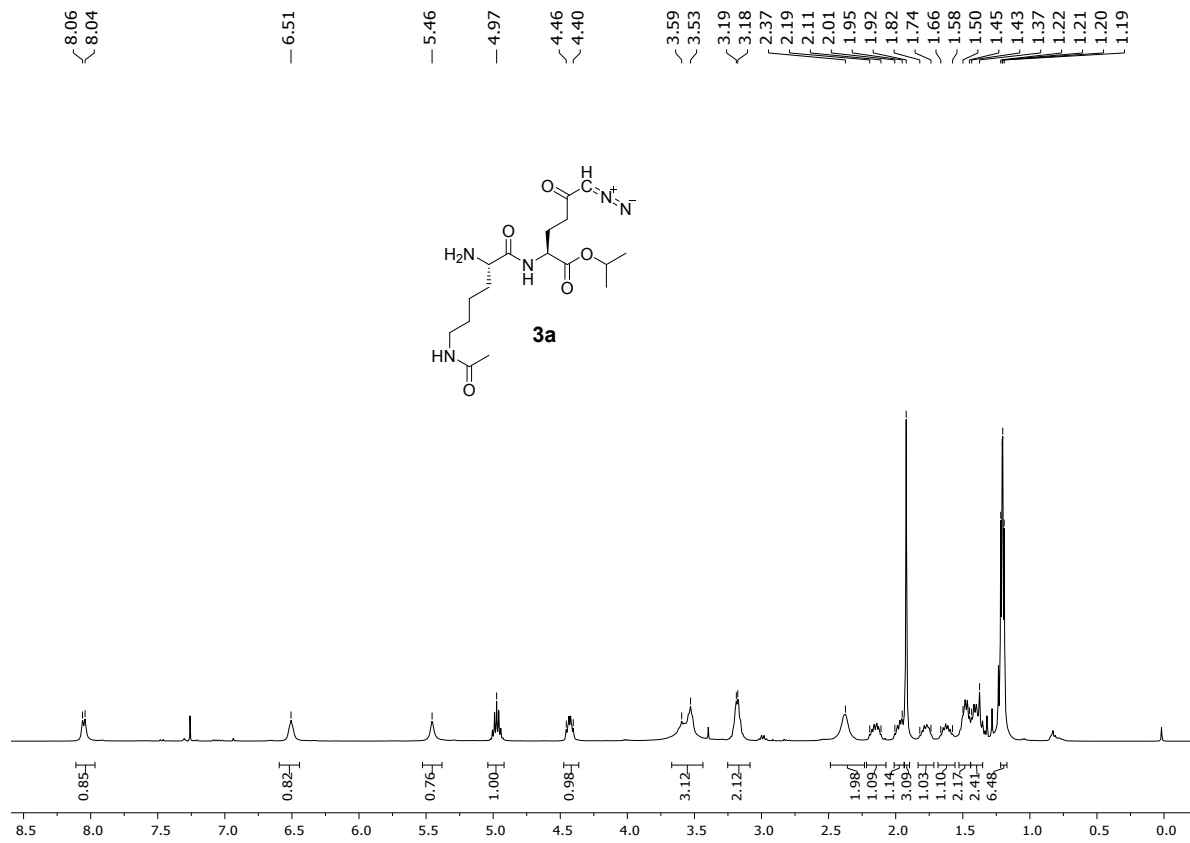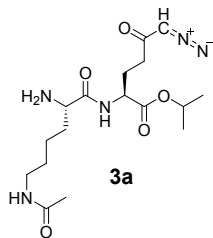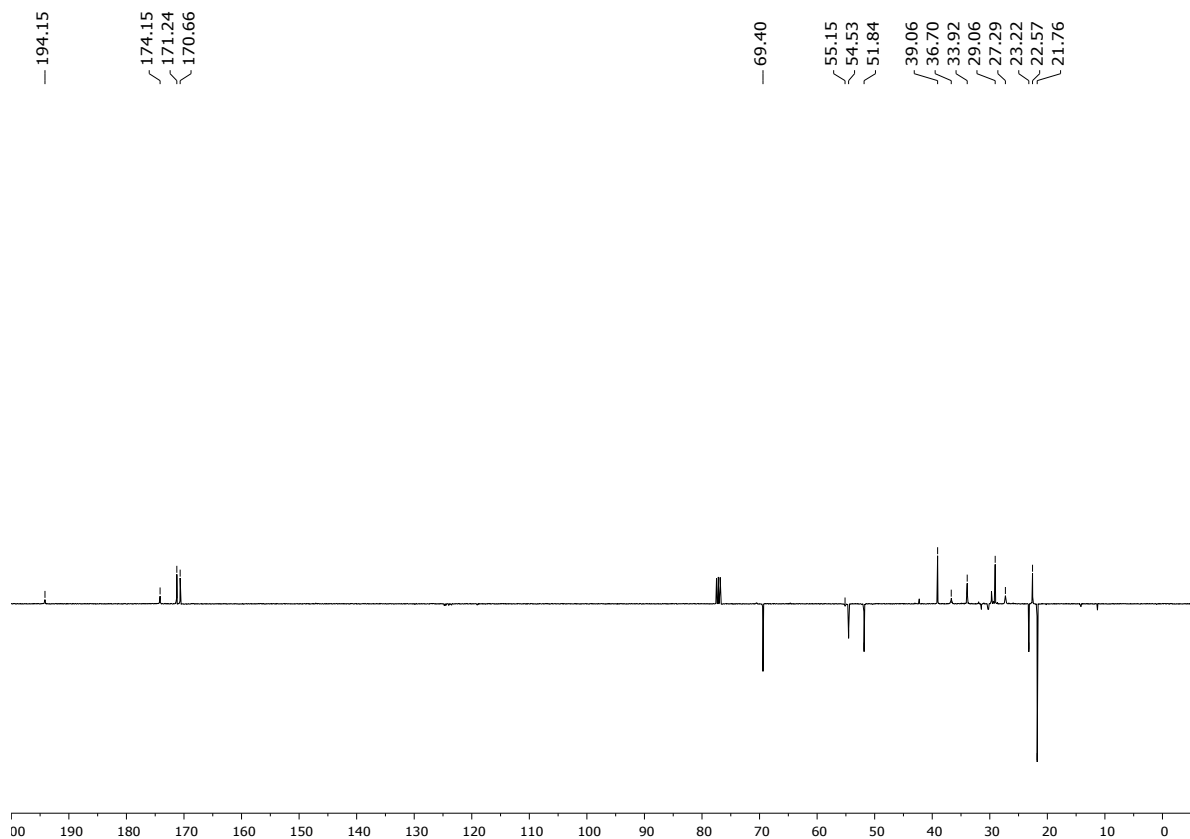

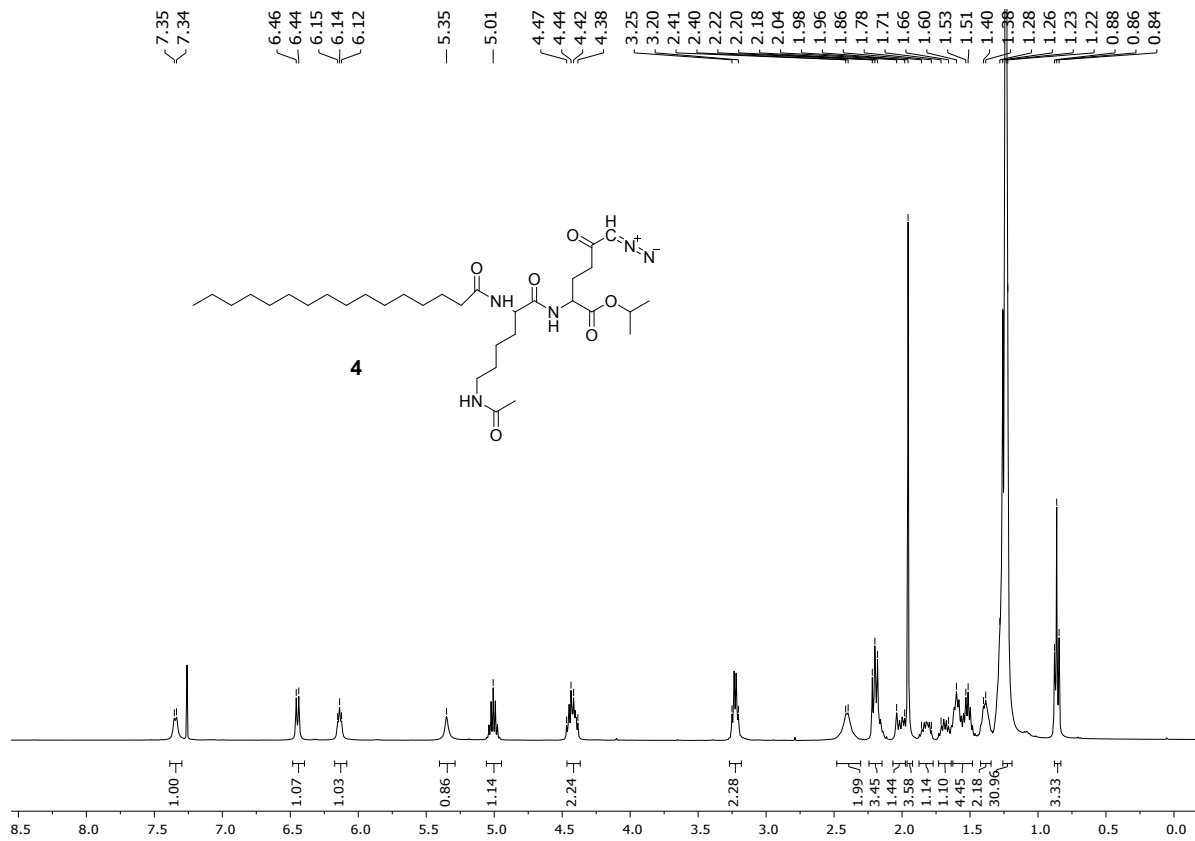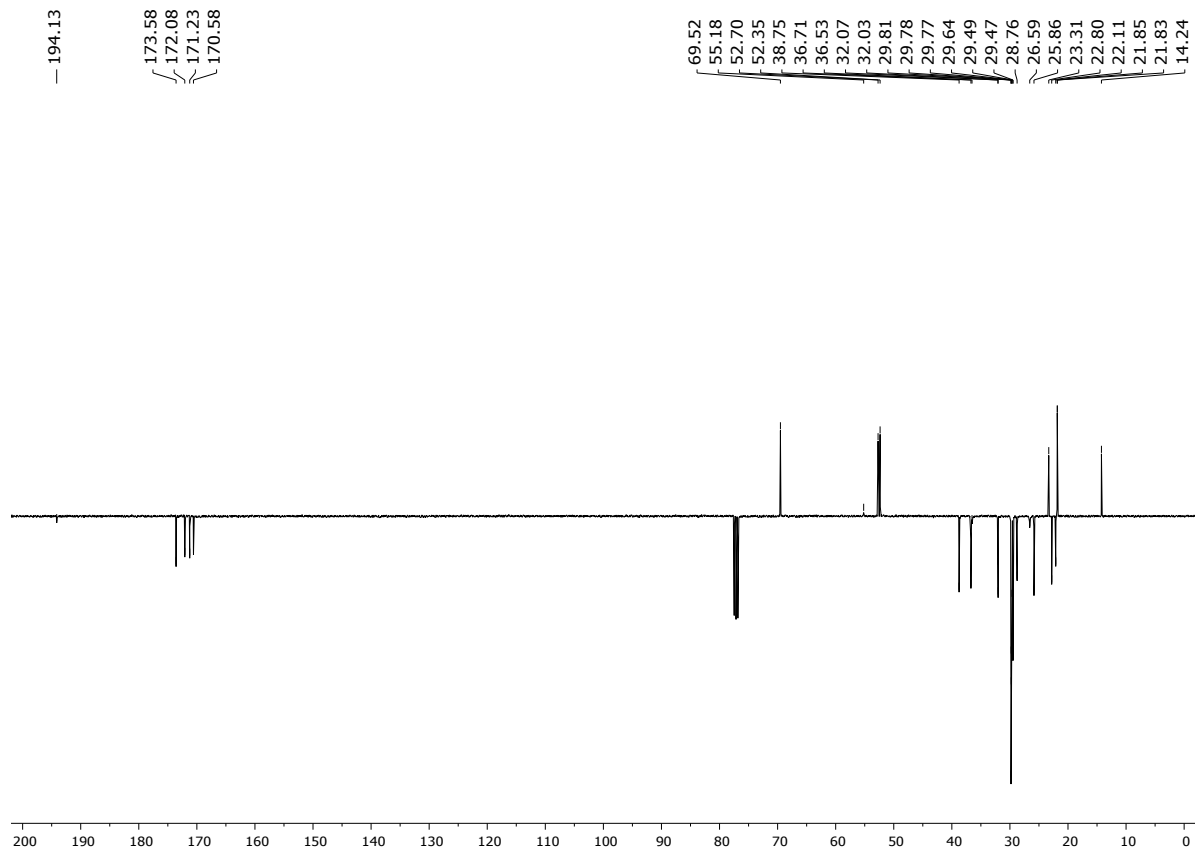

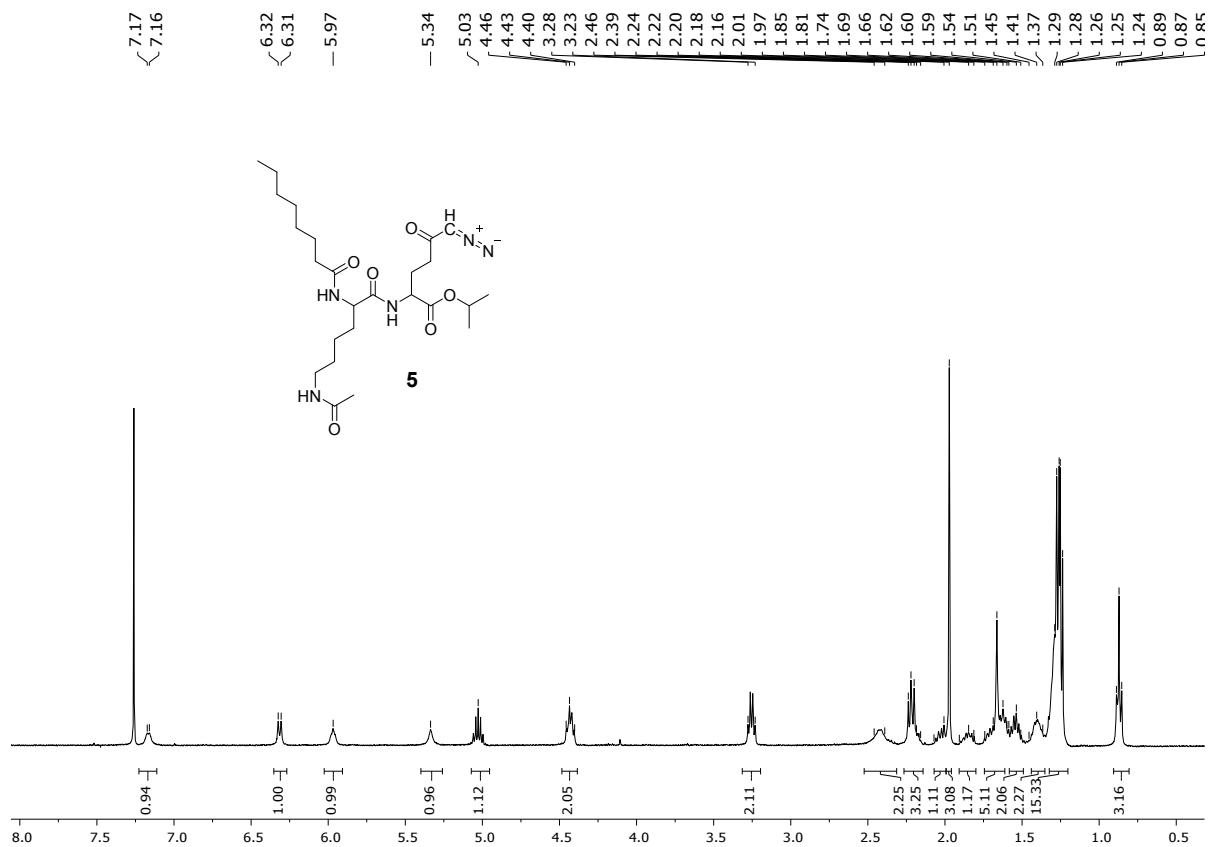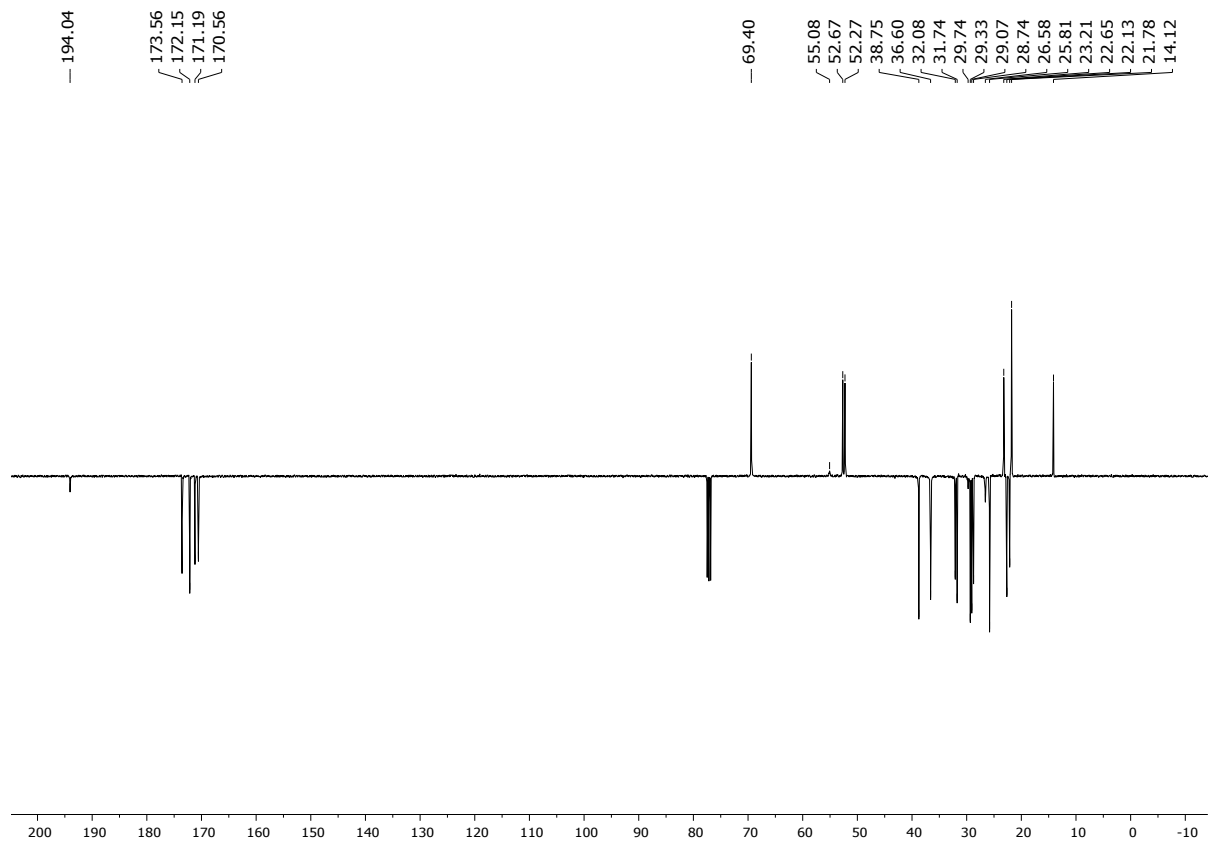



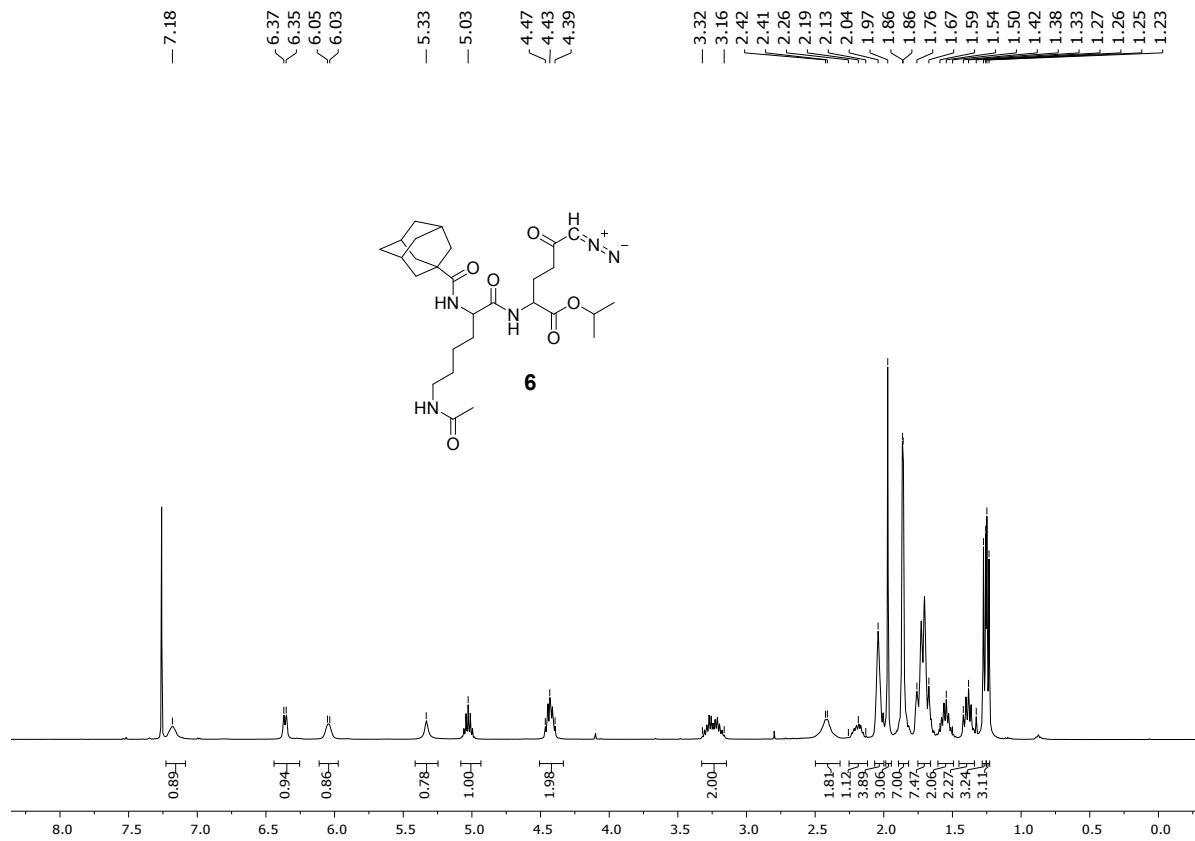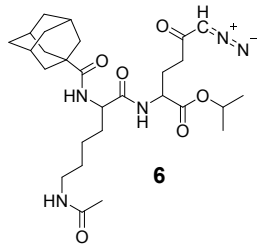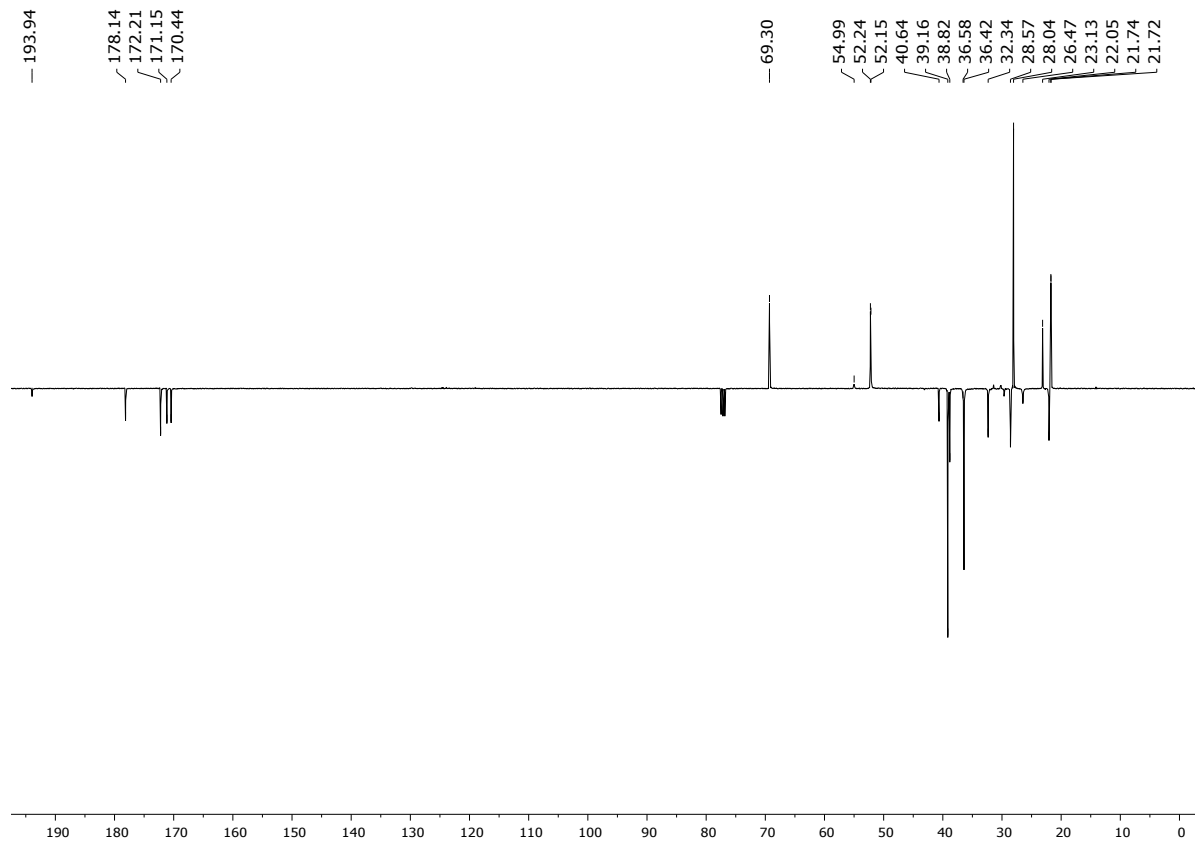

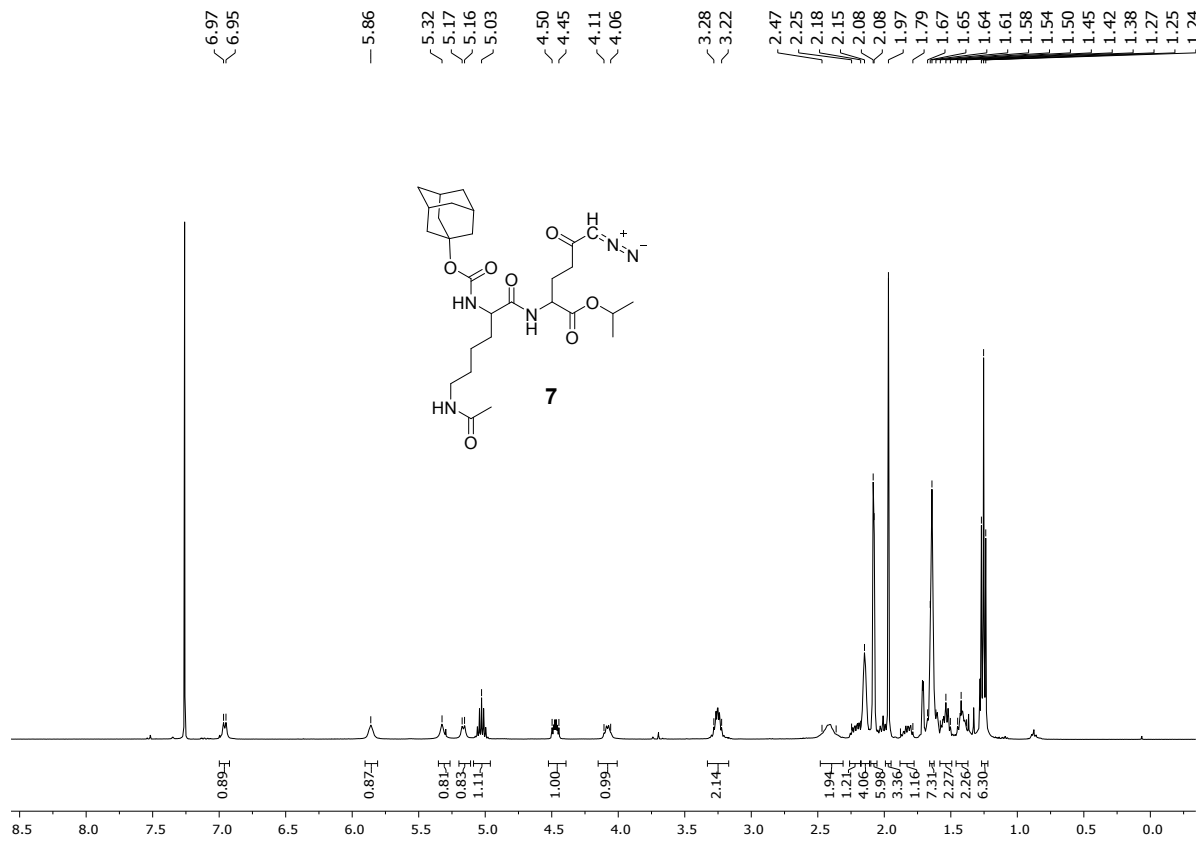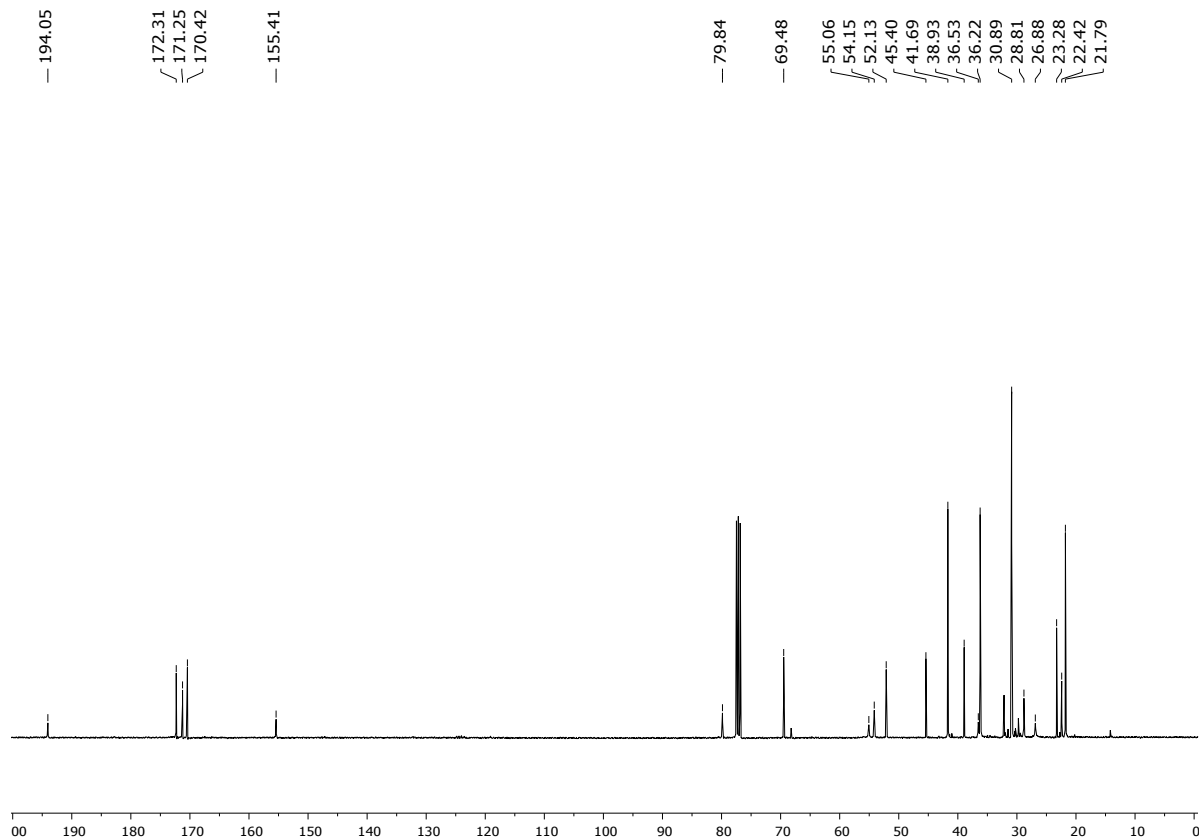

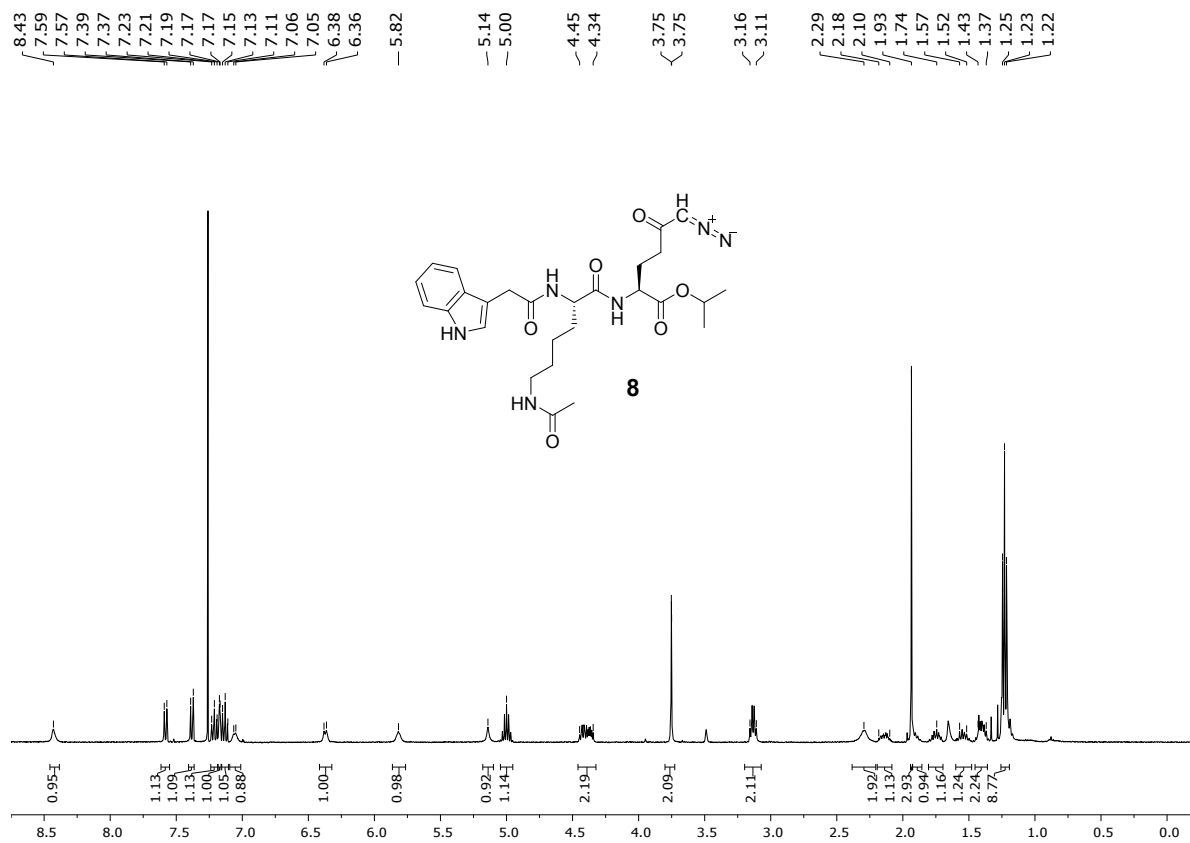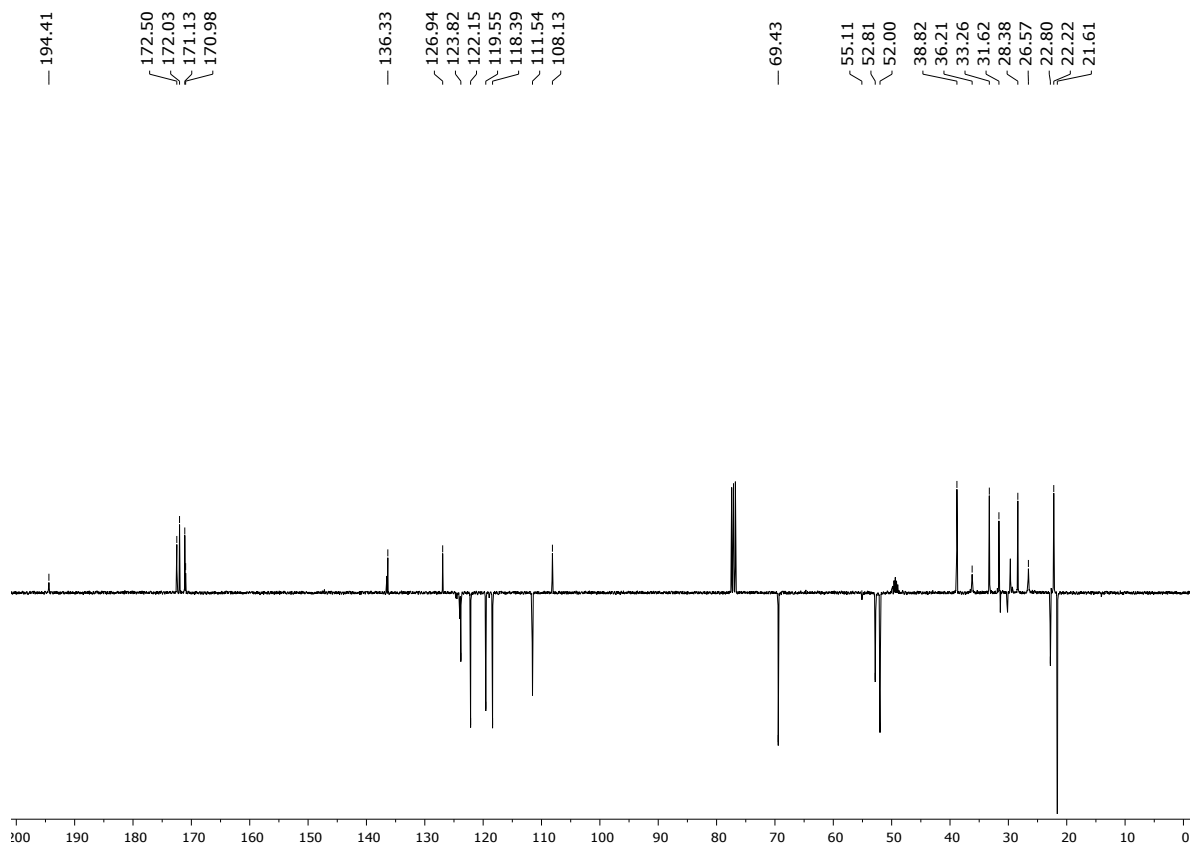

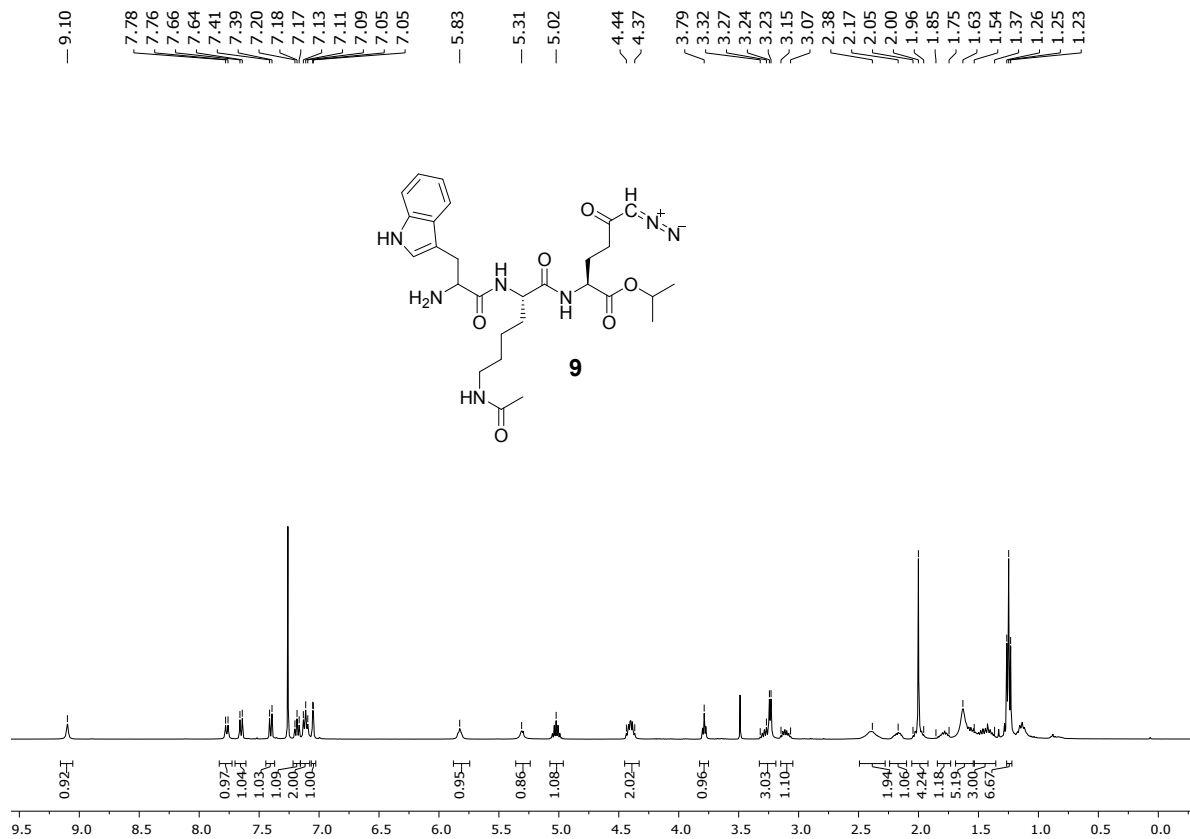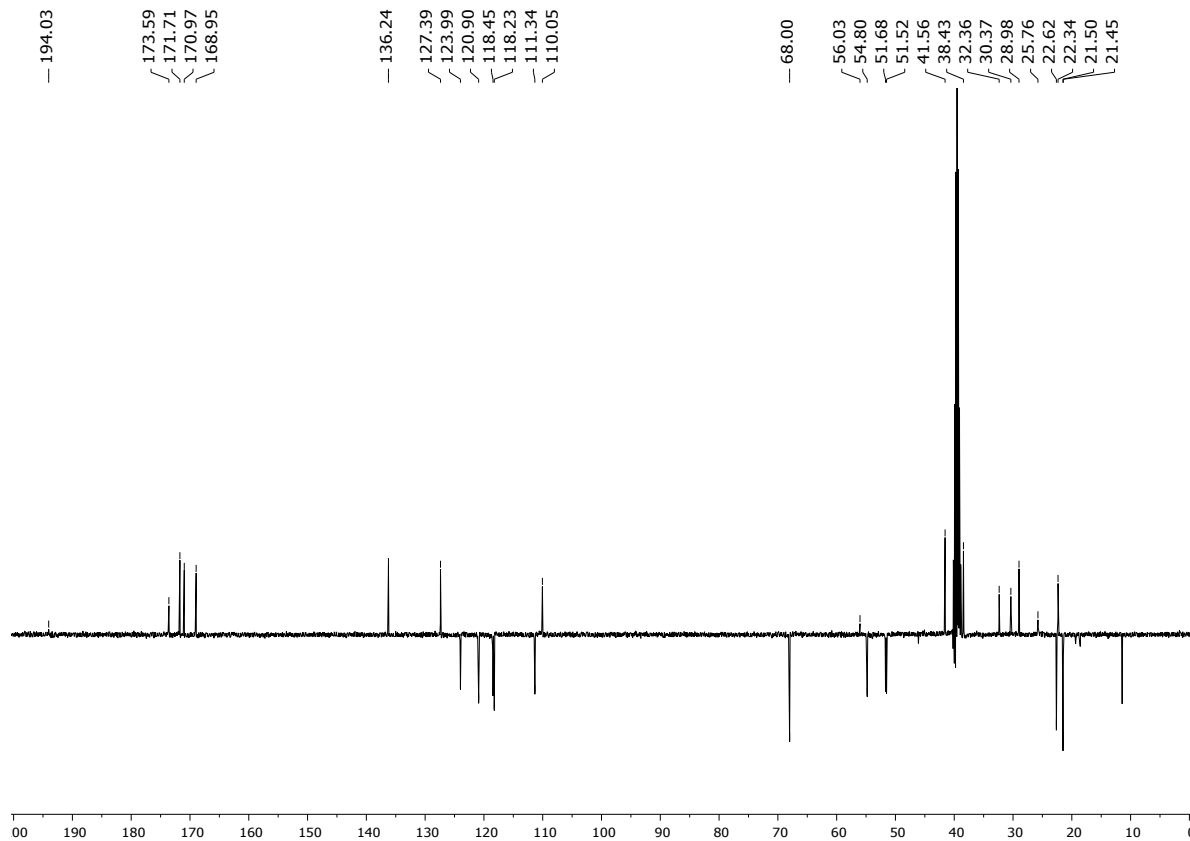

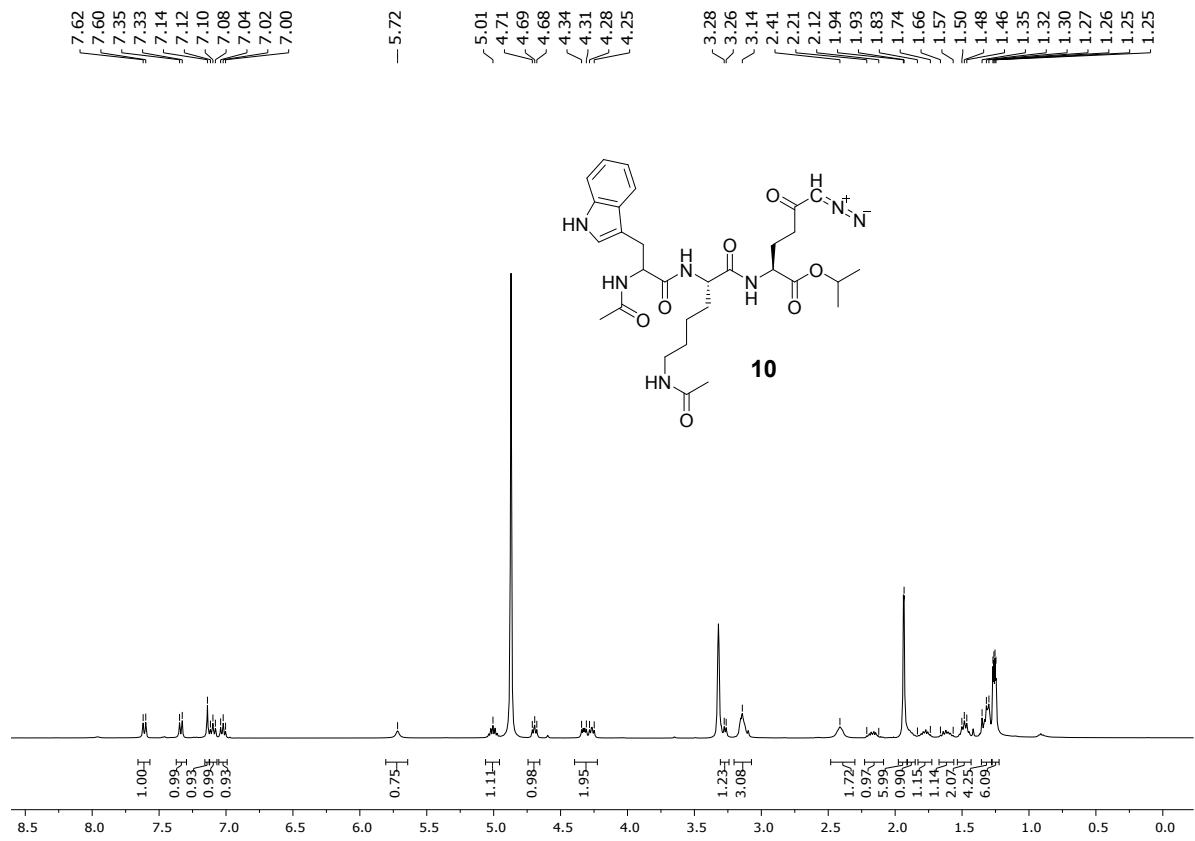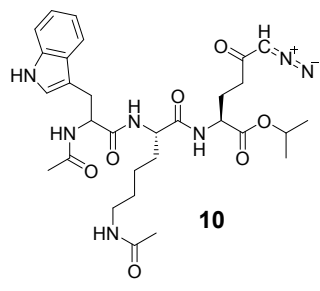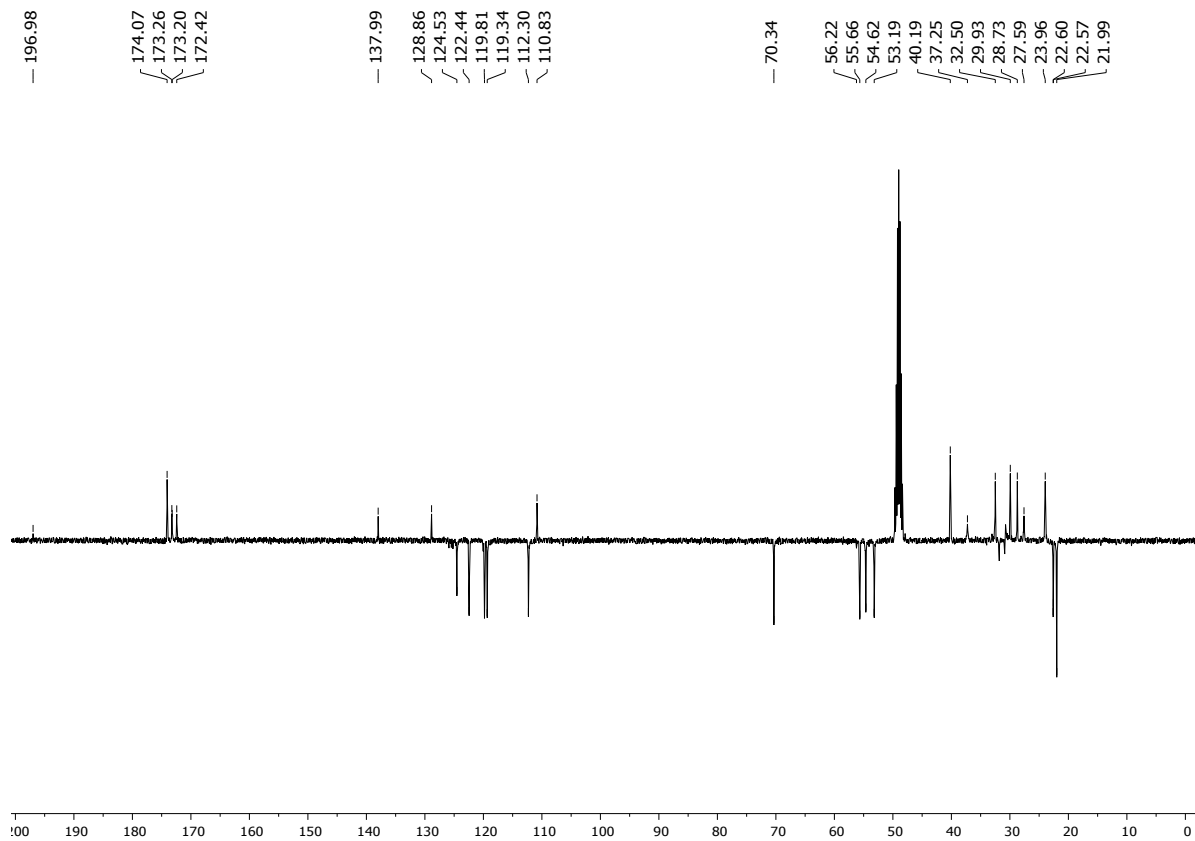

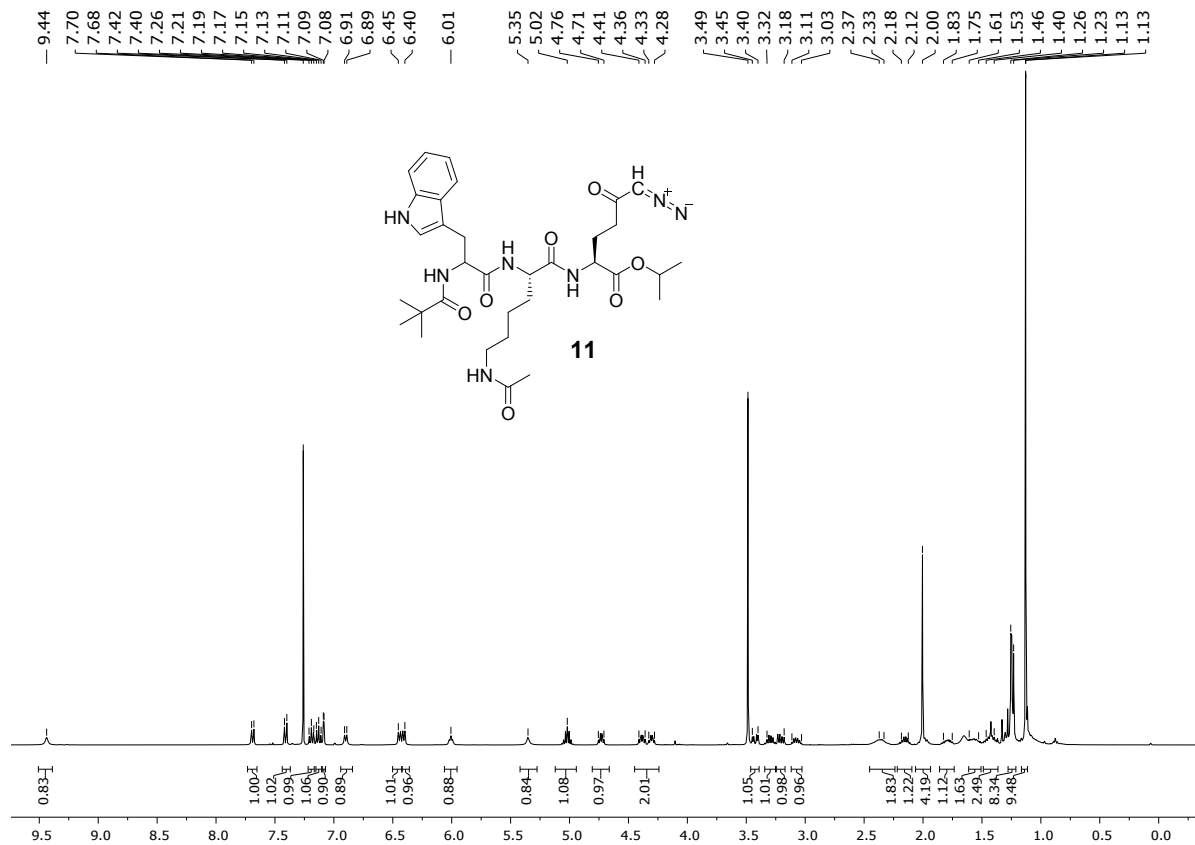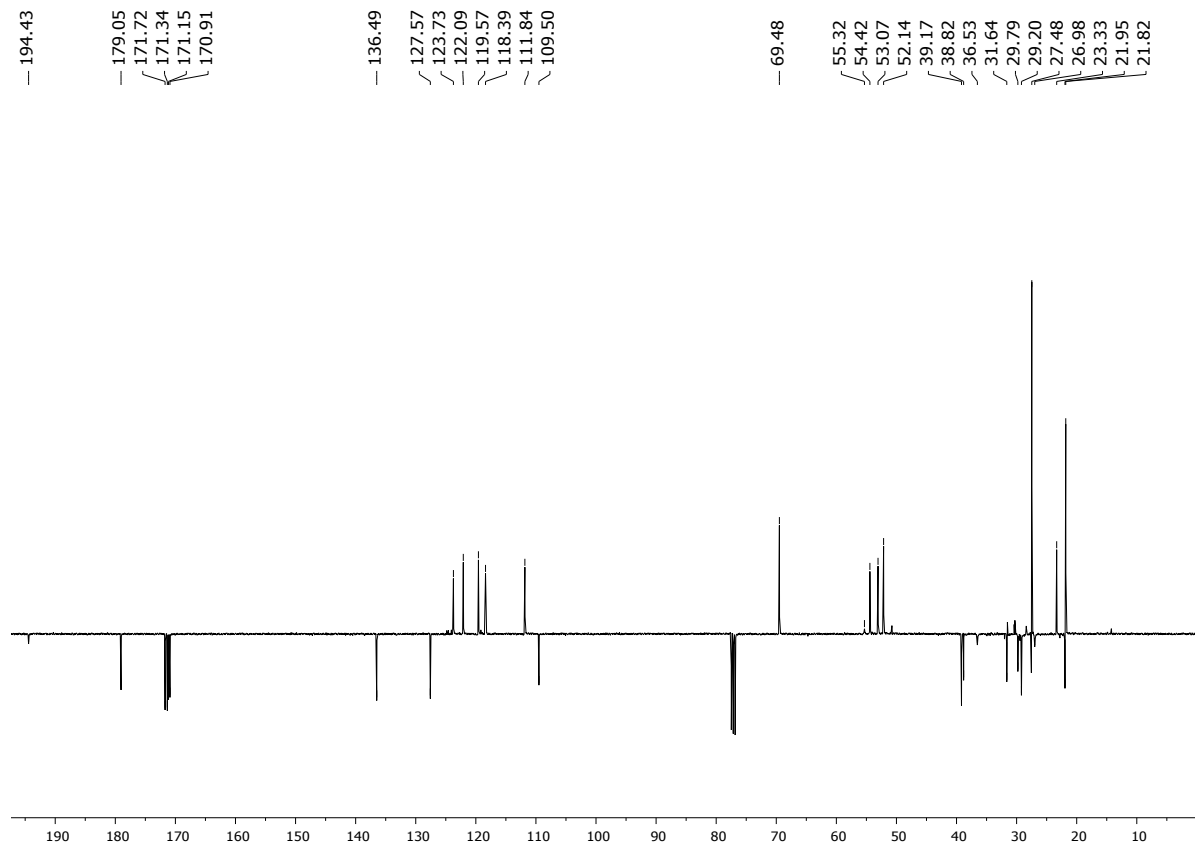

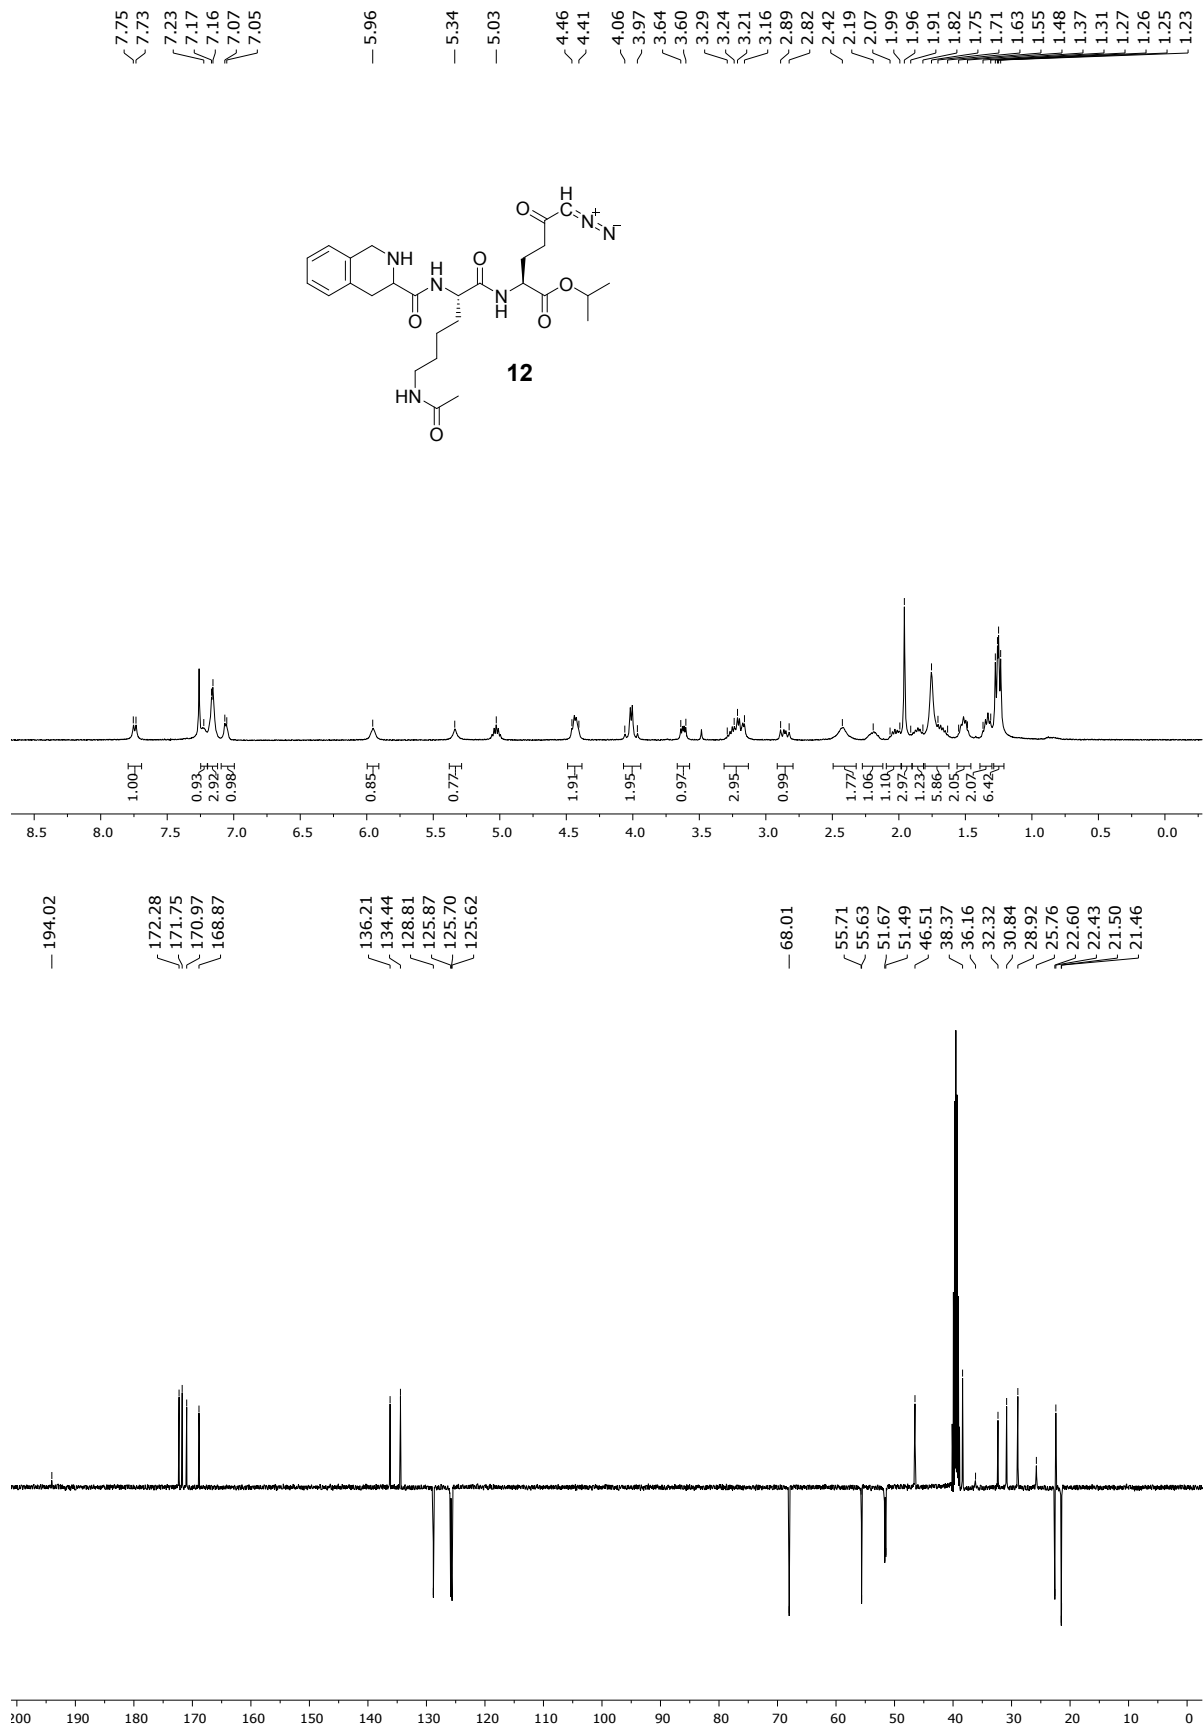

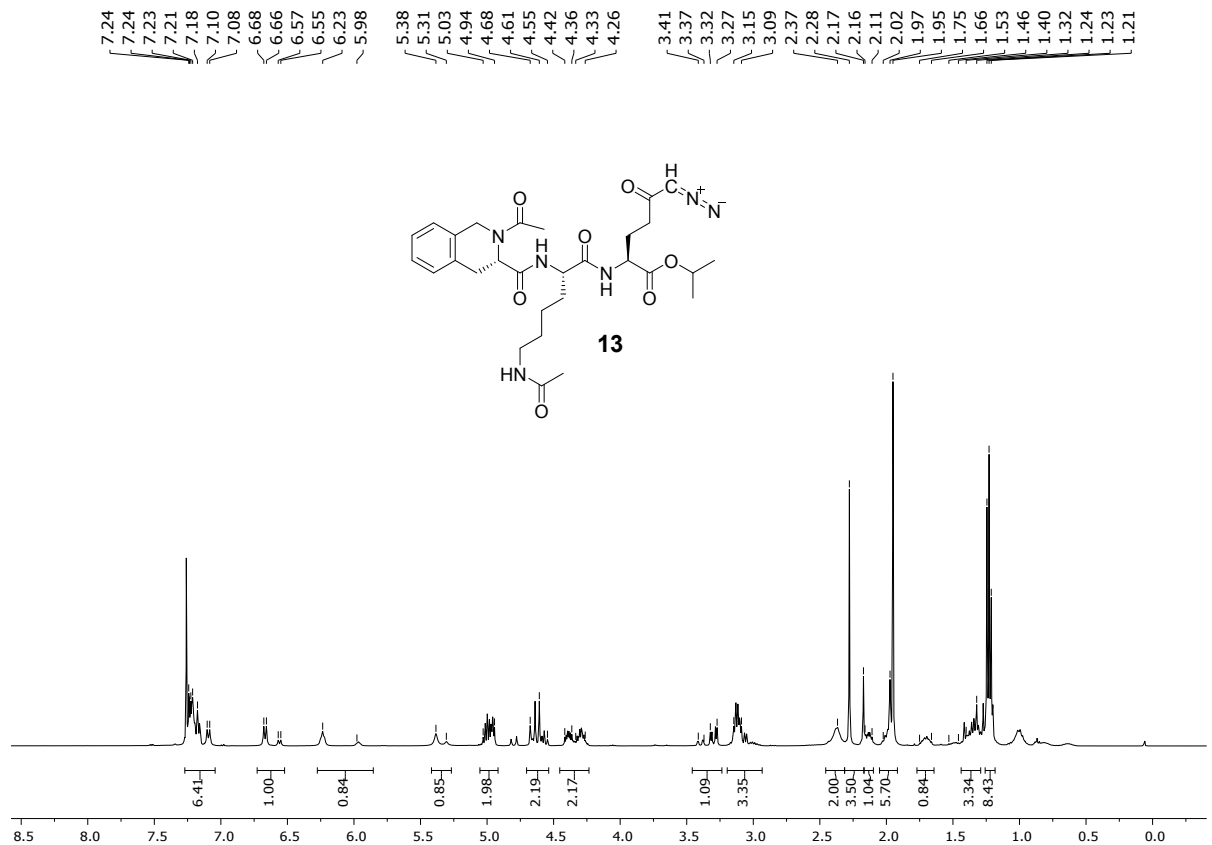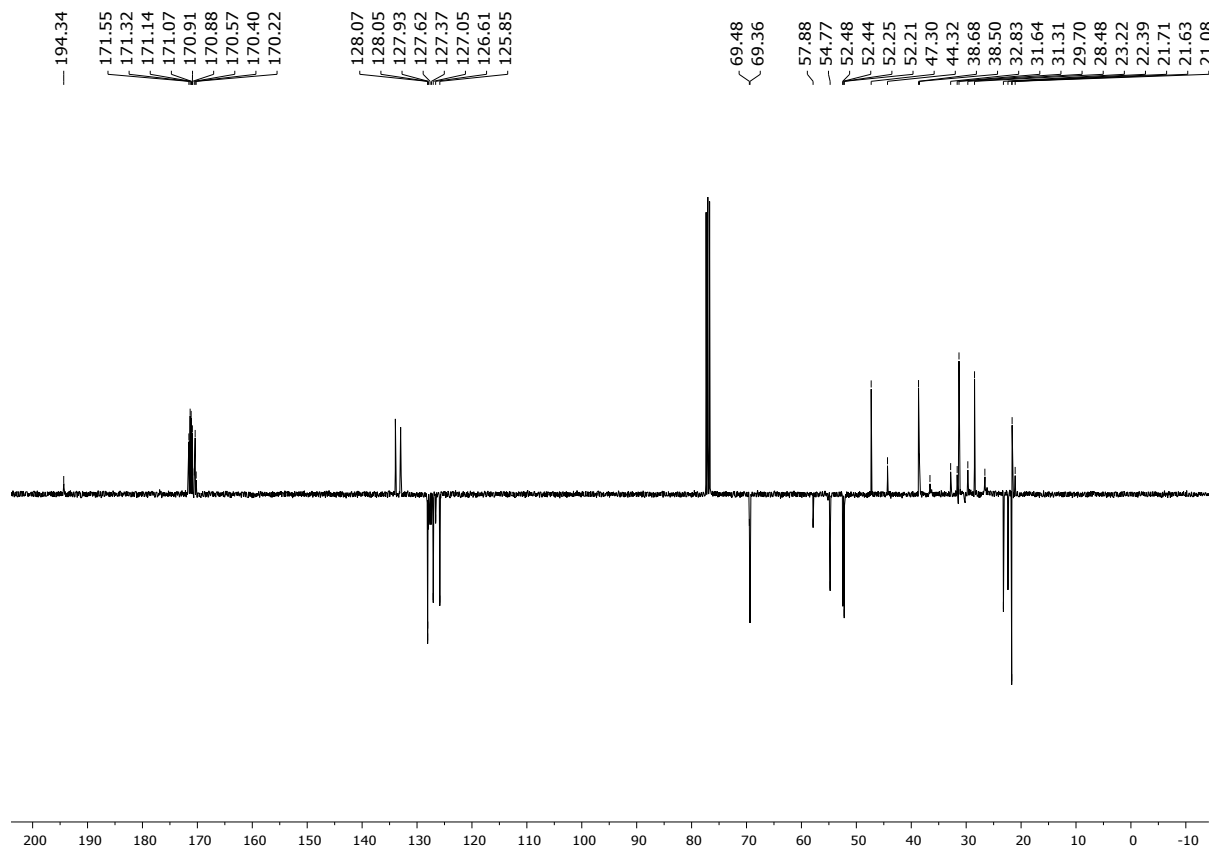



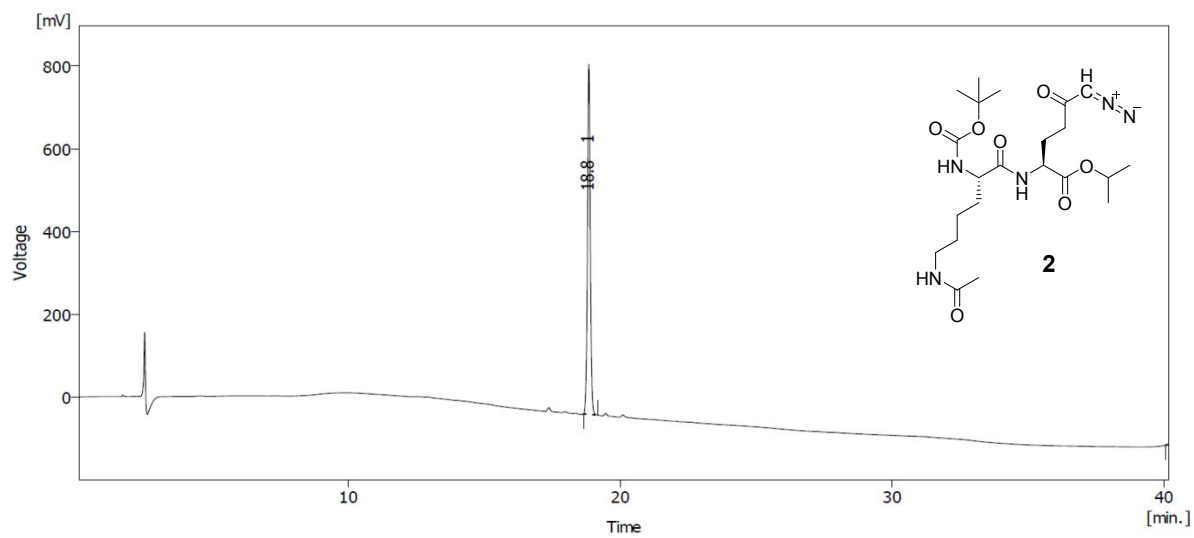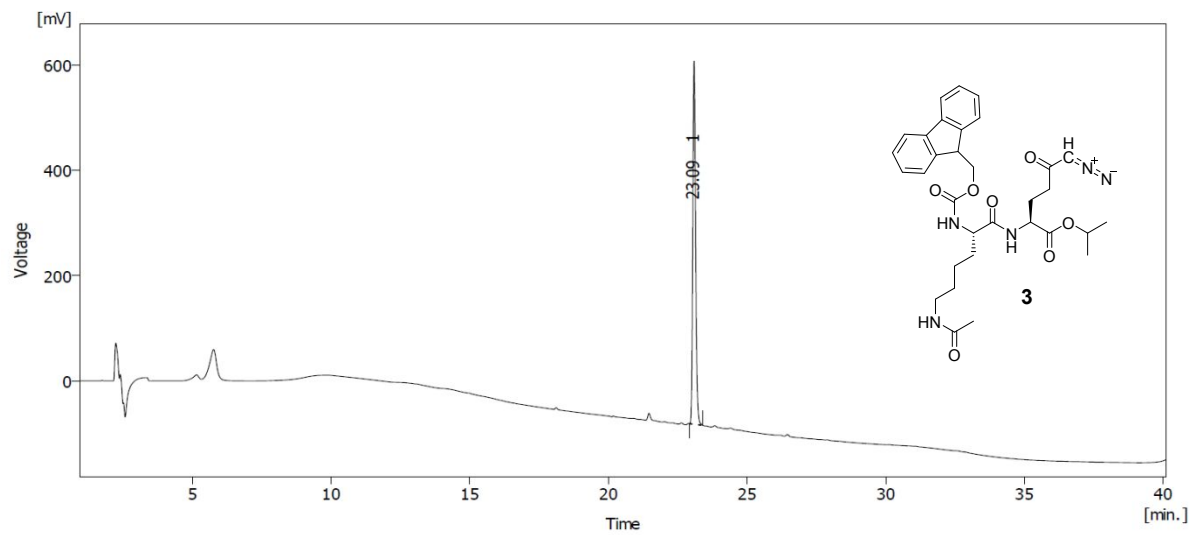

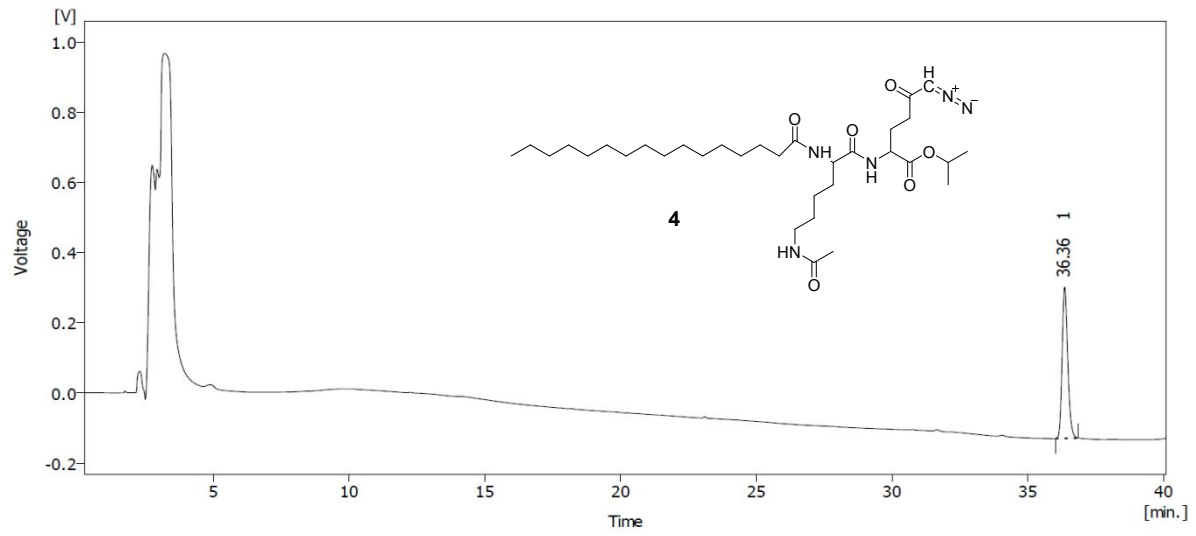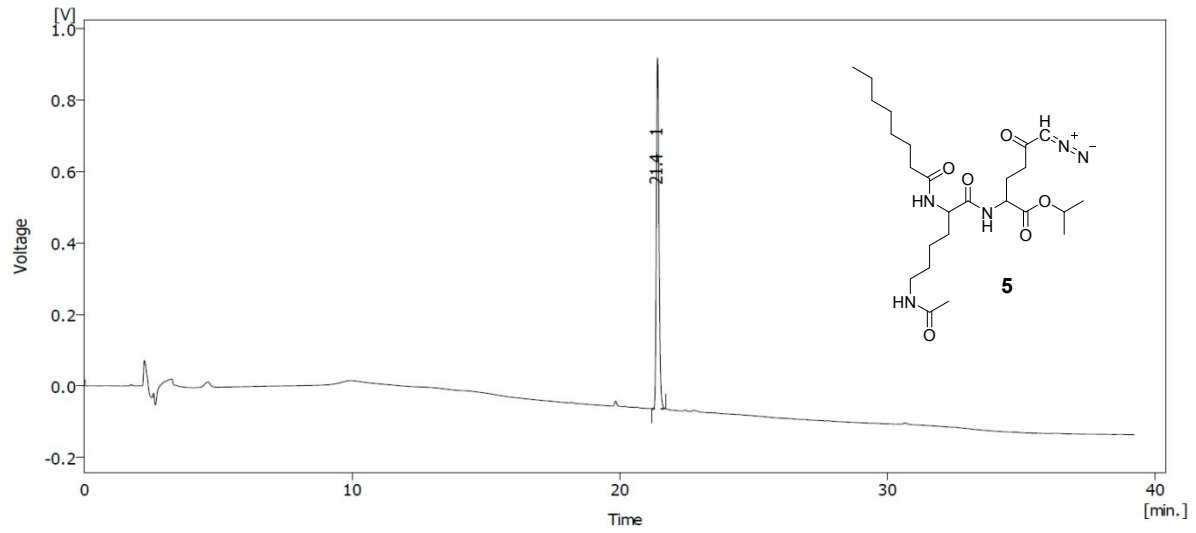

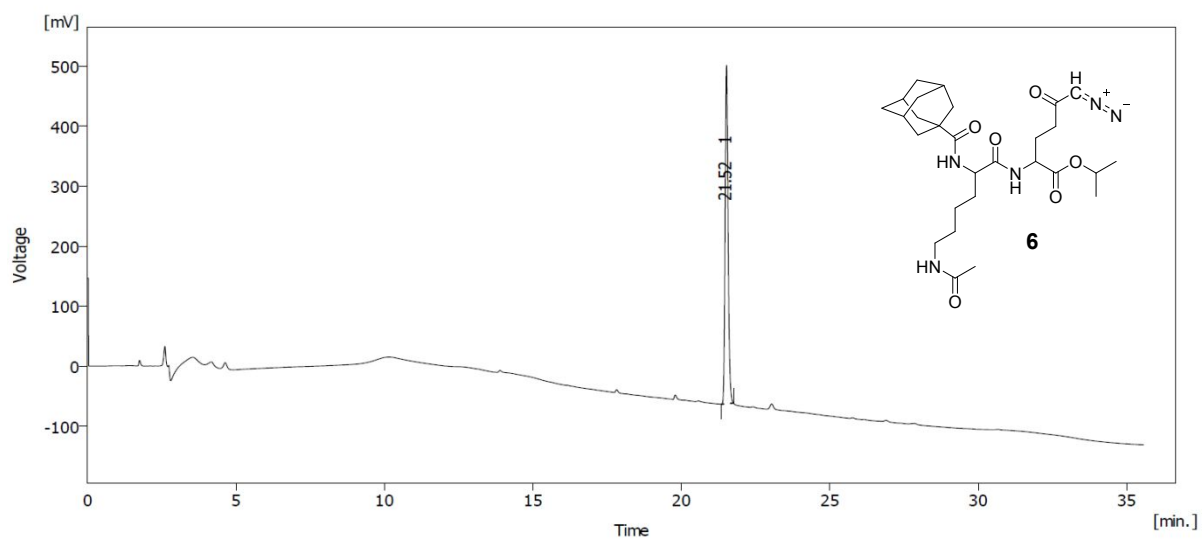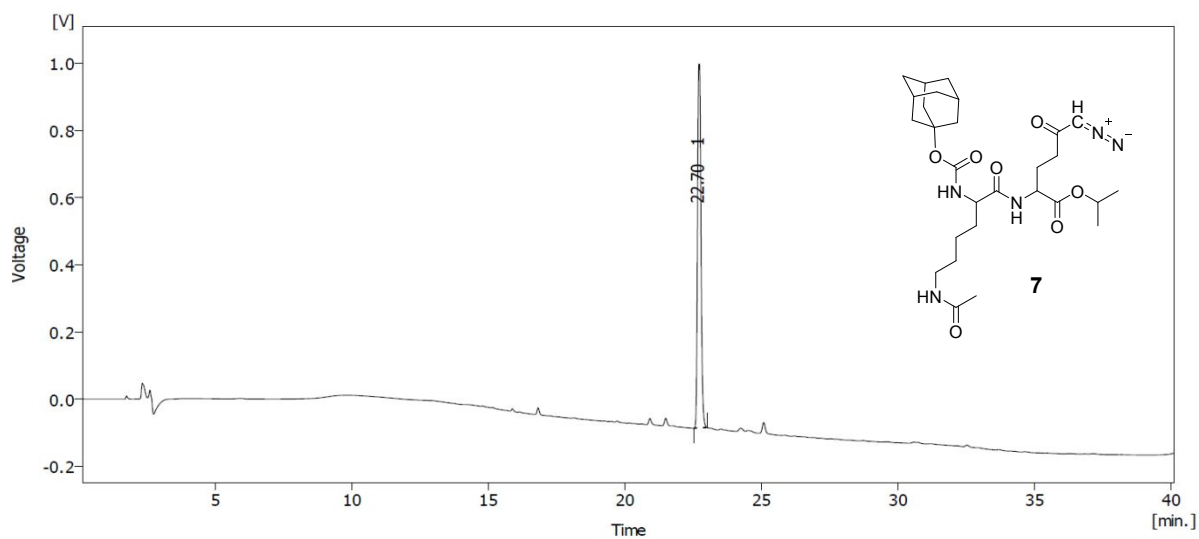

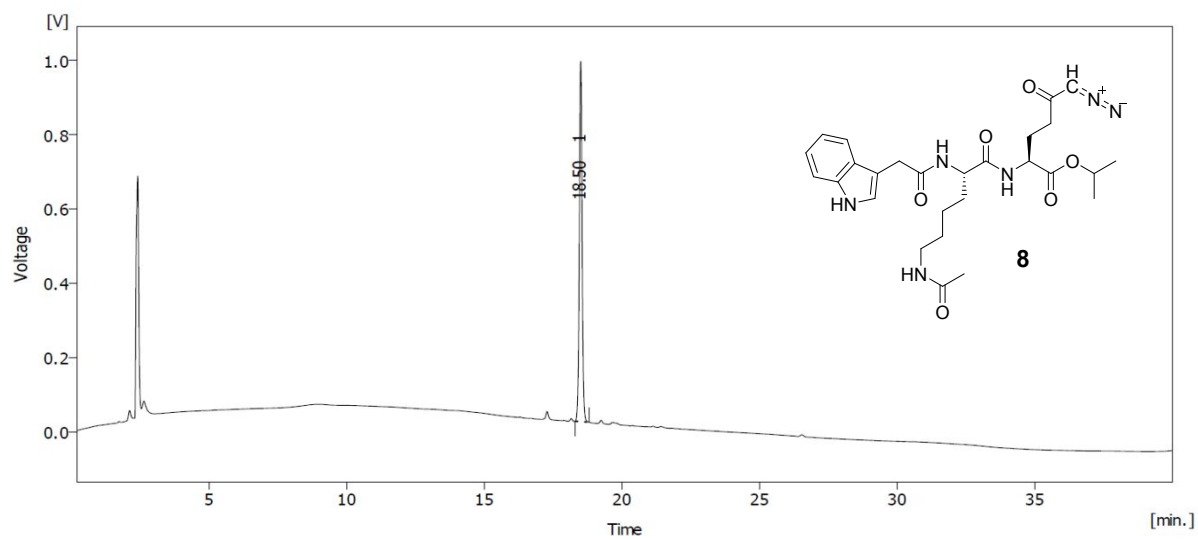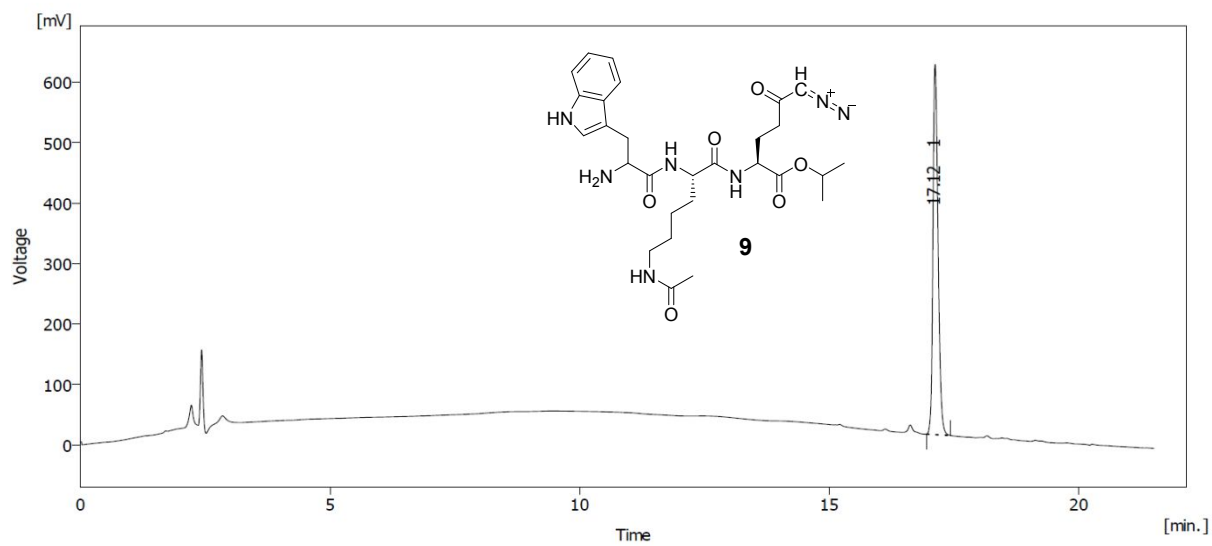

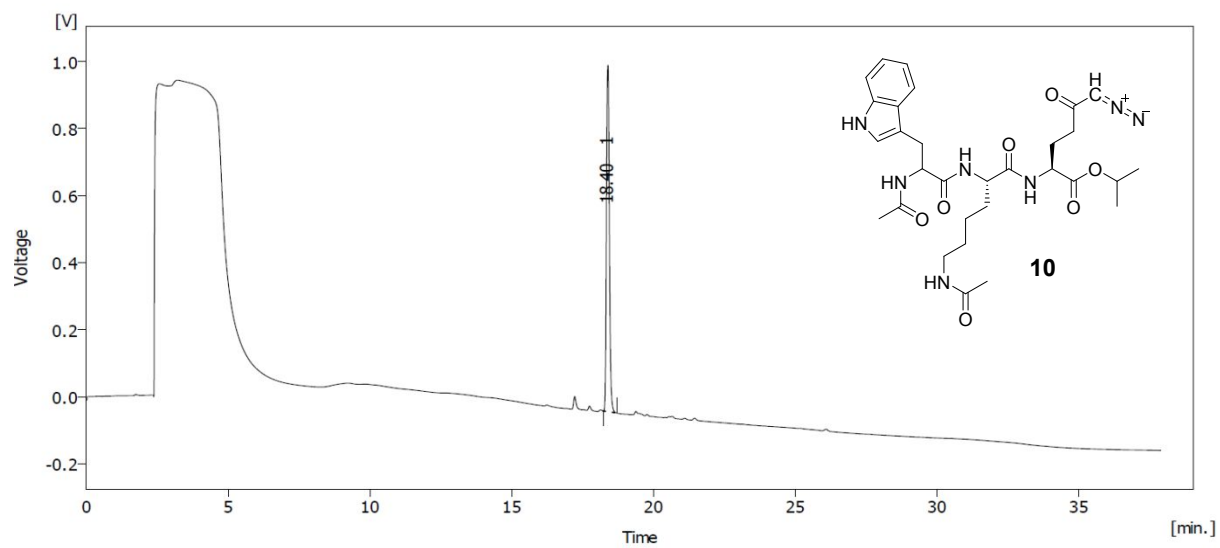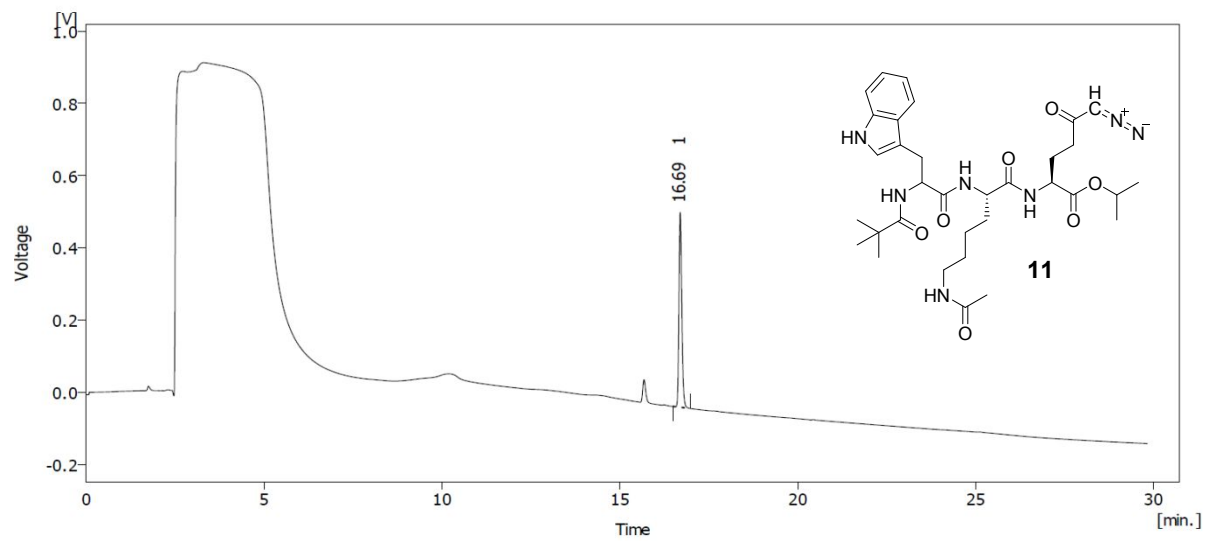

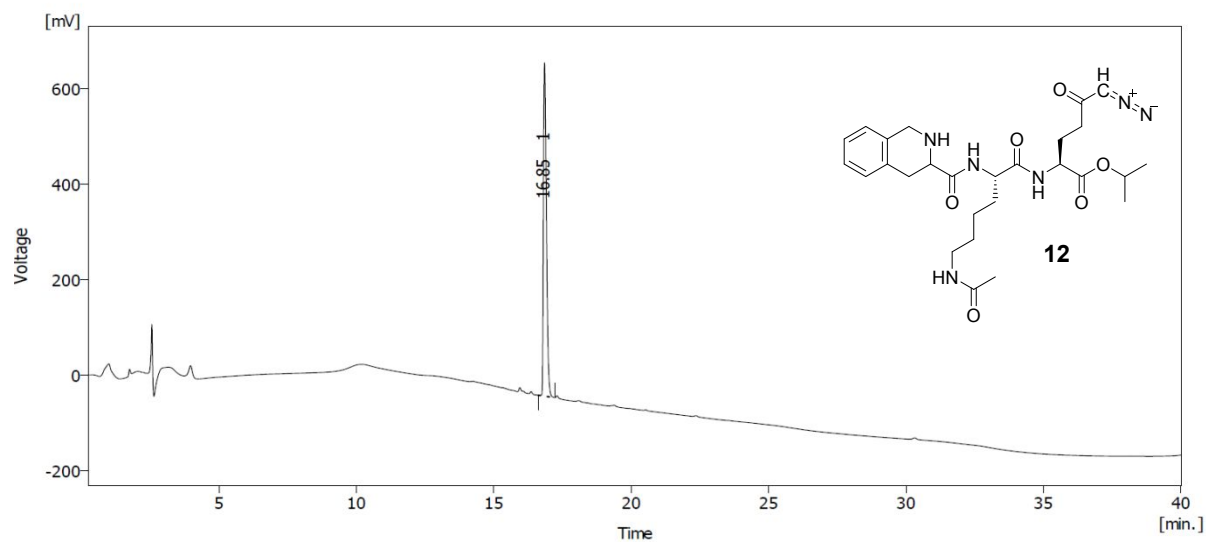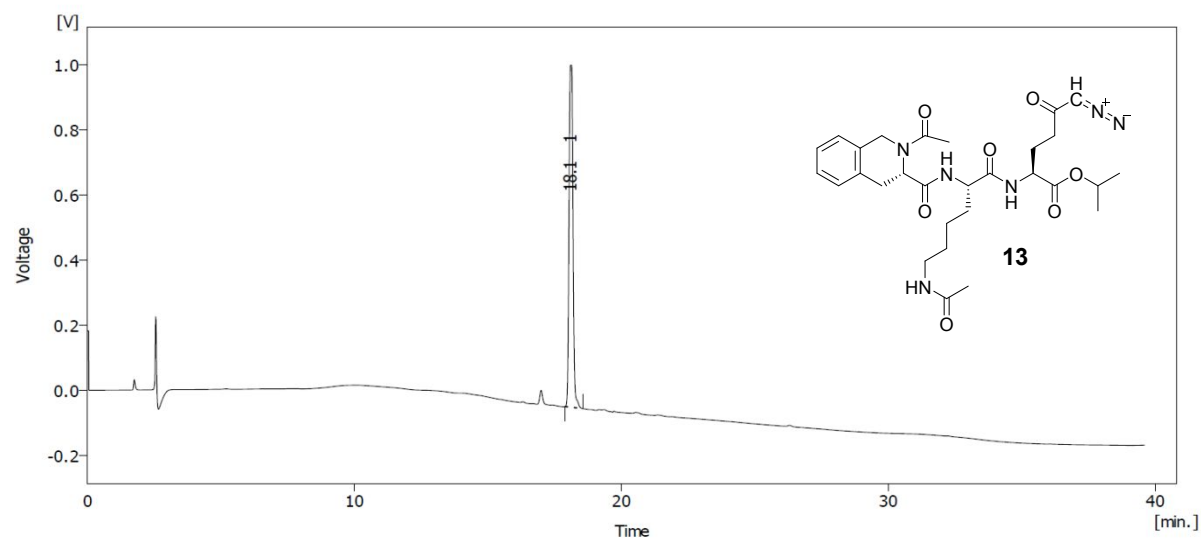

**Table S1. Mass transitions and conditions for 2-13 and internal standard (IS) used for LC-MS/MS analysis**

| <b>Ionization Mode</b> | <b>ESI, MRM(+)</b> |                              |            |               |
|------------------------|--------------------|------------------------------|------------|---------------|
| <b>Compound</b>        | <b>Q1</b>          | <b>Q3</b>                    | <b>CE</b>  | <b>S-Lens</b> |
| 2                      | 506.317            | 165.100, 378.316             | 26, 16     | 83            |
| 3                      | 578.185            | 154.043, 518.358             | 38, 26     | 145           |
| 4                      | 594.237            | 153.959                      | 40         | 135           |
| 5                      | 482.158            | 153.981, 464.386             | 35, 18     | 112           |
| 6                      | 518.142            | 153.976, 500.401             | 40, 22     | 121           |
| 7                      | 534.174            | 135.066, 516.425             | 37, 20     | 124           |
| 8                      | 513.003            | 158.980, 495.283             | 34, 18     | 146           |
| 9                      | 542.225            | 153.964, 524.378             | 39, 17     | 139           |
| 10                     | 583.996            | 158.930                      | 39         | 169           |
| 11                     | 561.001            | 158.958                      | 36         | 166           |
| 12                     | 515.220            | 126.008, 132.006,<br>497.357 | 27, 38, 18 | 143           |
| 13                     | 556.941            | 131.993, 539.304             | 51, 20     | 118           |
| Losartan (IS)          | 422.938            | 184.580, 209.275             | 37, 46     | 120           |

A

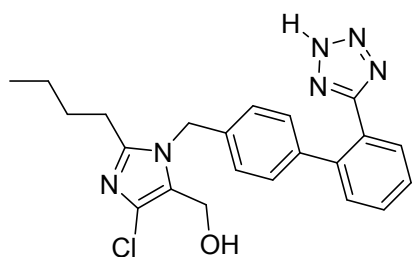

Chemical Formula:  $C_{22}H_{23}ClN_6O$   
Molecular Weight: 422.92

B

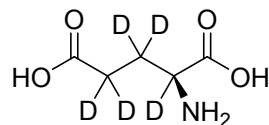

Chemical Formula:  $C_5H_4D_5NO_4$   
Molecular Weight: 152.16

**Figure S1. (A)** Structure of internal standard, losartan, used in LC-MS/MS analysis for **2-13. (B).**

Structure of internal standard, L-glutamic acid-2,3,3,4,4-*d*<sub>5</sub>, used in LC/MS/MS for DON (**1**)



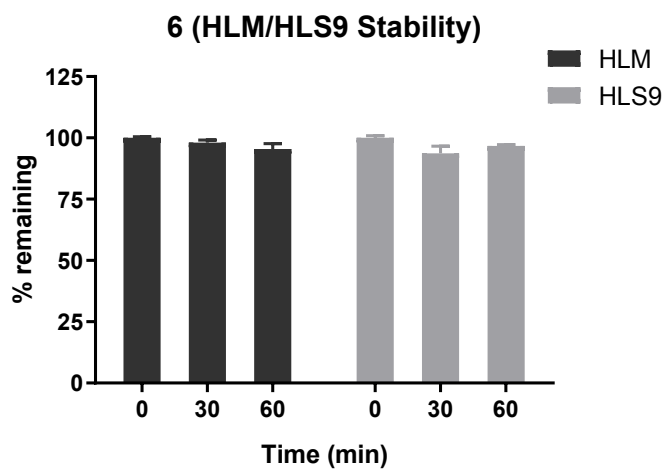

**Figure S2. Stability of 6 in human liver fractions.** 6 was incubated at 1  $\mu$ M concentration in both human liver microsomes (0.2 mg/mL) and S9 fractions (0.5 mg/mL). 6 was found to be stable in both assays.

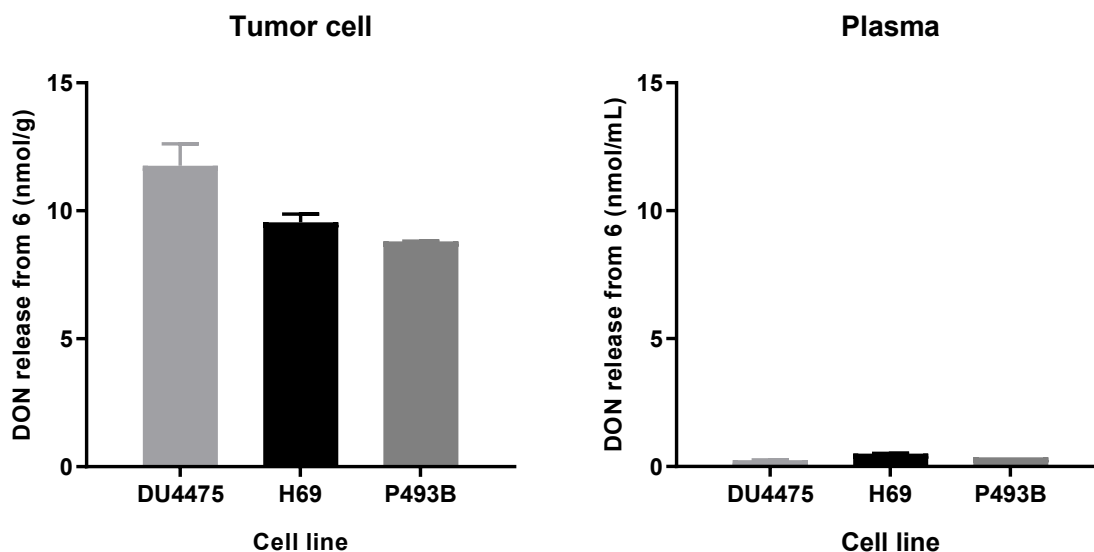

**Figure S3. Human tumor cell to plasma partitioning of 6 in DU4475, H69 and P493B cell lines.** (A) DON levels were similar in tumor cells from all three cell lines. (B) Plasma levels of DON were relatively lower in DU4475 cells giving the best cell-to-plasma ratio of 47 followed by a ratio of 19 and 24 for H69 and P493B cells, respectively.

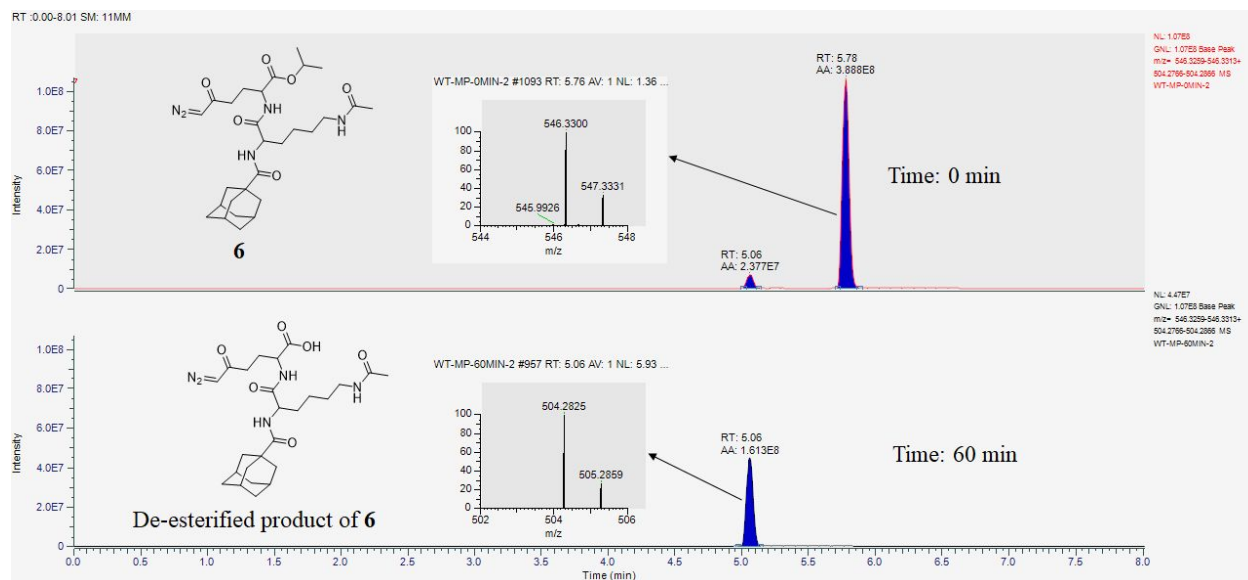

**Figure S4.** Extracted chromatogram and corresponding spectra obtained from HRMS analysis of in vitro wild type mouse plasma stability study samples showing the intact **6** at 0 min and complete de-esterification of the isopropyl ester of compound **6** following 60 min incubation at 37 °C.
